# Supplementary material for: A Systematic Review on Quiescent State Research Approaches in S. cerevisiae
Source: Cells. 2023 Jun 12;12(12):1608. doi: 10.3390/cells12121608 (PMC10297366; doi:10.3390/cells12121608)
Supplement: Supplementary file 1 [file cells-12-01608-s001.zip › QUIESCENCE_excluded.xlsx]

## Sheet: Metadata
Opalek et al. 2023
A systematic review on quiescent state research approaches in S. cerevisiae
Supplementary File
List of articles excluded during the full text screening with the corresponding reson for exclusion

## Sheet: excluded
Title	DOI	Year	include	Reason for exclusion	Comment
Adenylate Energy Charge in Saccharomyces cerevisiae During Starvation	https://doi.org/10.1128/jb.121.3.975-982.1975	1975	no	quiescent or quiescence wasn't used
Folded Chromosomes in Non-Cycling Yeast Cells	10.1007/BF02569039	1978	no	quiescent or quiescence wasn't used
A Probe Into Nuclear Events During the Cell Cycle of Saccharomyces cerevisiae: Studies of Folded Chromosomes in cdc Mutants which Arrest in G1	10.1007/BF00328771	1979	no	quiescent or quiescence wasn't used
Reserve Carbohydrate Metabolism in Saccharomyces cerevisiae: Responses to Nutrient Limitation	10.1128/jb.143.3.1384-1394.1980	1980	no	quiescent or quiescence wasn't used
Folded Chromosomes of Saccharomyces cerevisiae	10.1007/BF00368150	1980	no	quiescent or quiescence wasn't used
New mutations in the yeast Saccharomyces cerevisiae affecting completion of "start"	10.1007/BF00420500	1981	no	quiescent or quiescence wasn't used	"quiesent" used in the context of mammalian cells
A Comparison of the Radiosensitivity of Stationary, Exponential and G1 Phase Wild Type and Repair Deficient Yeast Cultures: Supporting Evidence for Stationary Phase Yeast Cells Being in G0	10.1080/09553008214550231	1982	no	quiescent or quiescence wasn't used
Specific Early-G, Blocks Accompanied with Stringent Response in Saccharomyces cerevisiae Lead to Growth Arrest in Resting State Similar to the Go of Higher Eucaryotes	DOI: 10.1083/jcb.98.4.1185	1984	no	quiescent or quiescence wasn't used	"quiesent" used in the context of mammalian cells
Possible involvement of RAS-encoded proteins in glucose-induced inositolphospholipid turnover in Sacccharomyces cerevisiae	10.1073/pnas.83.21.8172	1986	no	quiescent or quiescence wasn't used
Mathematical Models for a G O Phase in Saccharomyces cerevisiae	10.1016/S0022-5193(87)80059-0	1987	no	quiescent or quiescence wasn't used
Control of the G1-G0 transition and G0 protein synthesis by cyclic AMP in Saccharomyces cerevisiae	10.1007/BF00368059	1987	no	quiescent or quiescence wasn't used
A Yeast Gene Essential for Regulation of Spindle Pole Duplication	10.1128/mcb.8.12.5386-5397.1988	1988	no	quiescent or quiescence wasn't used
Regulation of proliferation by the budding yeast Saccharomyces cerevisiae	10.1139/o90-060	1989	no	wrong article type	review
Genetic Assessment of Stationary Phase for Cells of the Yeast Saccharomyces cerevisiae	0021-9193/90/073584-06$02.00/0	1990	no	quiescent or quiescence wasn't used
Induction of Yeast Histone Genes by Stimulation of Stationary-Phase Cells	0270-7306/90/126356-06$02.00/0	1990	no	quiescent or quiescence wasn't used
The glucose-induced polyphosphoinositides turnover in Saccharomyces cerevisiae is not dependent on the CDC25-RAS mediated signal transduction pathway	https://doi.org/10.1016/0014-5793(90)81319-J	1990	no	quiescent or quiescence wasn't used
Influence of DNA repair deficiencies on the UV sensitivity of yeast cells in different cell cycle stages	10.1016/0165-7992(90)90158-g	1990	no	quiescent or quiescence wasn't used
The adenylate cyclase/protein kinase cascade regulates entry into meiosis in Saccharomyces cerevisiae through the gene IME1	PMCID: PMC552053	1990	no	quiescent or quiescence wasn't used
Glycogen hyperaccumulation in Saccharomyces cerevisiae ras2 mutant A biochemical study	001457939100871Q	1991	no	quiescent or quiescence wasn't used
Involvement of the CDC25 gene product in the signal transmission pathway of the glucose-induced RAS-mediated cAMP signal in the yeast Saccharomyces cerevisiae	10.1099/00221287-137-2-341	1991	no	quiescent or quiescence wasn't used
Induction of a Heat-Shock-Type Response in Saccharornyces cerevisiae Following Glucose Limitation	10.1002/yea.320070407	1991	no	quiescent or quiescence wasn't used
Carbon Source Induces Growth of Stationary Phase Yeast Cells, Independent of Carbon Source Metabolism	10.1002/yea.320090503	1992	no	quiescent or quiescence wasn't used	"Quiescent" used only in the reference list
The Growth Arrest-Specific Gene, gas1, Is Involved in Growth Suppression	Cell, Vol. 70, 595-607, August 21, 1992, Copyright 0 1992 by Cell Press	1992	no	not on S.cerevisiae	conducted on cell lines, not on S.cerevisiae
Stress resistance of yeast cells is largely independent of cell cycle phase	10.1002/yea.320090105	1993	no	quiescent or quiescence wasn't used
Changes in Gene Expression in the Ras/Adenylate Cyclase System of Saccharomyces cerevisiae: Correlation with cAMP Levels and Growth Arrest	10.1091/mbc.4.7.757	1993	no	quiescent or quiescence wasn't used
Protein Synthesis in Long-Term Stationary-Phase Cultures of Saccharomyces cerevisiae	10.1128/jb.176.18.5802-5813.1994	1994	no	quiescent or quiescence wasn't used
Growth-related coordinate regulation of the early N-glycosylation genes in yeast	10.1093/glycob/4.4.437	1994	no	quiescent or quiescence wasn't used
Differential changes in the activity of cytosolic and vacuolar trehalases along the growth cycle of Saccharomyces cerevisiae	10.1016/0304-4165(94)90130-9	1994	no	quiescent or quiescence wasn't used
Autoregulatory control of E2F1 expression in response to positive and negative regulators of cell cycle progression	10.1101/gad.8.13.1514	1994	no	not on S.cerevisiae
TOR Controls Translation Initiation and Early G1 Progression in Yeast	10.1091/mbc.7.1.25	1995	no	quiescent or quiescence wasn't used
Constitutive glucose-induced activation of the Ras-cAMP pathway and aberrant stationary-phase entry on a glucose-containing medium in the Saccharomyces cerevisiae glucose-repression mutant hex2	https://doi.org/10.1099/13500872-141-7-1559	1995	no	quiescent or quiescence wasn't used
Catabolic capacity of Saccharomyces cerevisiae in relation to the physiological state and maintenance requirement	10.1016/0040-6031(94)02142-b	1995	no	quiescent or quiescence wasn't used
The chromatin of the Saccharomyces cerevisiae centromere shows cell-type specific changes	10.1007/BF00352113	1996	no	quiescent or quiescence wasn't used
Yeast bcy1 mutants with stationary phase-specific defects	10.1007/s002940050251	1997	no	quiescent or quiescence wasn't used
Deregulation of CLN1 and CLN2 in the Saccharomyces cerevisiae whi2 Mutant	DOI: 10.1002/(SICI)1097-0061(19970630)13:8<707::AID-YEA130>3.0.CO;2-9	1997	no	quiescent or quiescence wasn't used
Isolation and characterization of Saccharomyces cerevisiae genes differentially expressed under different growth conditions	J. Gen. App!. MicrobioL, 43, 217-224 (1997)	1997	no	quiescent or quiescence wasn't used
A Novel Membrane-bound Glutathione S-Transferase Functions in the Stationary Phase of the Yeast Saccharomyces cerevisiae	10.1074/jbc.273.45.29915	1998	no	quiescent or quiescence wasn't used
mRNA translation in yeast during entry into stationary phase	https://doi.org/10.1007/s004380050814	1998	no	quiescent or quiescence wasn't used
Growth-Dependent Change of the 26S Proteasome in Budding Yeast	Growth-Dependent Change of the 26S Proteasome in Budding Yeast	1998	no	quiescent or quiescence wasn't used
E2F3 activity is regulated during the cell cycle and is required for the induction of S phase	10.1101/gad.12.14.2120	1998	no	not on S.cerevisiae
Rapamycin induces the G0 program of transcriptional repression in yeast by interfering with the TOR signaling pathway	10.1128/MCB.18.8.4463	1998	no	quiescent or quiescence wasn't used
Treatment of the budding yeast Saccharomyces cerevisiae with the lipid peroxidation product 4-HNE provokes a temporary cell cycle arrest in G1 phase	https://doi.org/10.1016/S0891-5849(98)00110-5	1998	no	quiescent or quiescence wasn't used
E2F3 activity is regulated during the cell cycle and is required for the induction of S phase	10.1101/gad.12.14.2120	1998	no	not on S.cerevisiae
Involvement of the Saccharomyces cerevisiae UTH1 gene in the oxidative-stress response	Curr Genet (1998) 34: 259–268	1998	no	quiescent or quiescence wasn't used
Mitochondrial Superoxide Decreases Yeast Survival in Stationary Phase	10.1006/abbi.1999.1158	1999	no	quiescent or quiescence wasn't used
DNA Damage-Inducible and RAD52-Independent Repair of DNA Double-Strand Breaks in Saccharomyces cerevisiae	PMID: 10757755	1999	no	quiescent or quiescence wasn't used
Glucose starvation induces a drastic reduction in the rates of both transcription and degradation of mRNA in yeast	10.1016/s0167-4781(00)00016-6	2000	no	quiescent or quiescence wasn't used
Nutrient-induced signal transduction through the protein kinase A pathway and its role in the control of metabolism, stress resistance, and growth in yeast	10.1016/s0141-0229(00)00177-0	2000	no	quiescent or quiescence wasn't used
The mechanical properties of Saccharomyces cerevisiae	10.1073/pnas.97.18.9871	2000	no	quiescent or quiescence wasn't used
SLG1 plays a role during G1 in the decision to enter or exit the cell cycle	10.1007/pl00008657	2000	no	quiescent or quiescence wasn't used
Saccharomyces cerevisiae Ras/cAMP pathway controls post-diauxic shift element-dependent transcription through the zinc ®nger protein Gis1	10.1093/emboj/19.11.2569	2000	no	quiescent or quiescence wasn't used
Regulation of Longevity and Stress Resistance by Sch9 in Yeast	101126/science.1059497	2001	no	quiescent or quiescence wasn't used
Adaptive reversions of a frameshift mutation in arrested Saccharomyces cerevisiae cells by simple deletions in mononucleotide repeats	https://doi.org/10.1016/S0027-5107(00)00141-X	2001	no	quiescent or quiescence wasn't used
Protein oxidation in G0 cells of Saccharomyces cerevisiae depends on the state rather than rate of respiration and is enhanced in pos9 but not yap1 mutants	10.1074/jbc.M101796200	2001	no	quiescent or quiescence wasn't used
The rye mutants identify a role for Ssn/Srb proteins of the RNA polymerase II holoenzyme during stationary phase entry in Saccharomyces cerevisiae	10.1093/genetics/157.1.17	2001	no	quiescent or quiescence wasn't used
The Ras/PKA Signaling Pathway of Saccharomyces cerevisiae Exhibits a Functional Interaction With the Sin4p Complex of the RNA Polymerase II Holoenzyme	10.1093/genetics/159.1.77	2001	no	quiescent or quiescence wasn't used
Adaptive reversions of a frameshift mutation in arrested Saccharomyces cerevisiae cells by simple deletions in mononucleotide repeats	https://doi.org/10.1016/S0027-5107(00)00141-X	2001	no	quiescent or quiescence wasn't used
Increasing Saccharomyces cerevisiae stress resistance, through the overactivation of the heat shock response resulting from defects in the Hsp90 chaperone, does not extend replicative life span but can be associated with slower chronological ageing of nondividing cells	10.1007/s004380000409	2001	no	quiescent or quiescence wasn't used
Mitogen-Regulated RSK2-CBP Interaction Controls Their Kinase and Acetylase Activities	DOI: 10.1128/MCB.21.20.7089–7096.2001	2001	no	not on S.cerevisiae	not on yeast
The inﬂuence of the mismatch-repair system on stationary-phase mutagenesis in the yeast Saccharomyces cerevisiae	10.1007/s00294-002-0334-7	2002	no	quiescent or quiescence wasn't used
Yeast Whi2 and Psr1-phosphatase form a complex and regulate STRE-mediated gene expression	10.1046/j.1365-2443.2002.00538.x	2002	no	quiescent or quiescence wasn't used
The shortened replicative life span of prohibitin mutants of yeast appears to be due to defective mitochondrial segregation in old mother cells	10.1046/j.1474-9728.2002.00018.x	2002	no	quiescent or quiescence wasn't used
Induction of the synthesis of an additional family of long-chain dolichols in the yeast Saccharomyces cerevisiae. Effect of starvation and ageing	https://doi.org/10.18388/abp.2002_3786	2002	no	quiescent or quiescence wasn't used
Regulation of the Cell Integrity Pathway by Rapamycin-sensitive TOR Function in Budding Yeast	10.1074/jbc.M205408200	2002	no	quiescent or quiescence wasn't used
Cystathionine b-Synthase Is Coordinately Regulated With Proliferation Through a Redox-Sensitive Mechanism in Cultured Human Cells and Saccharomyces cerevisiae	10.1002/jcp.10118	2002	no	quiescent or quiescence wasn't used	"quiescent" used in relation to human cell lines
SOD2 Functions Downstream of Sch9 to Extend Longevity in Yeast	10.1093/genetics/163.1.35	2003	no	quiescent or quiescence wasn't used
Chronological aging-independent replicative life span regulation by Msn2/Msn4 and Sod2 in Saccharomyces cerevisiae	10.1016/S0014-5793(03)01462-5	2003	no	quiescent or quiescence wasn't used
Transcription patterns of PMA1 and PMA2 genes and activity of plasma membrane H+-ATPase in Saccharomyces cerevisiae during diauxic growth and stationary phase	10.1002/yea.957	2003	no	quiescent or quiescence wasn't used
Base excision repair activities required for yeast to attain a full chronological life span	10.1046/j.1474-9728.2003.00041.x	2003	no	quiescent or quiescence wasn't used
TOR and PKA Signaling Pathways Converge on the Protein Kinase Rim15 to Control Entry into G0	10.1016/s1097-2765(03)00485-4	2003	no	quiescent or quiescence wasn't used
Proteasome Disassembly and Downregulation Is Correlated with Viability during Stationary Phase	10.1016/S0960-9822(03)00417-2	2003	no	quiescent or quiescence wasn't used
Non-homologous end joining as an important mutagenic process in cell cycle-arrested cells	10.1093/emboj/cdg203	2003	no	quiescent or quiescence wasn't used
Carbon Starvation Can Induce Energy Deprivation and Loss of Fermentative Capacity in Saccharomyces cerevisiae	10.1128/AEM.69.6.3251-3257.2003	2003	no	quiescent or quiescence wasn't used
Biodemographic trajectories of age-specific reproliferation from stationary phase in the yeast Saccharomyces cerevisiae seem multiphasic	https://doi.org/10.1016/j.mad.2003.08.003	2003	no	quiescent or quiescence wasn't used
Inorganic phosphate is sensed by specific phosphate carriers and acts in concert with glucose as a nutrient signal for activation of the protein kinase A pathway in the yeast Saccharomyces cerevisiae	10.1046/j.1365-2958.2003.03365.x	2003	no	quiescent or quiescence wasn't used
Cell cycle- and age-dependent activation of Sod1p drives the formation of stress resistant cell subpopulations within clonal yeast cultures	10.1046/j.1365-2958.2003.03715.x	2003	no	quiescent or quiescence wasn't used
Cellular Differentiation in Response to Nutrient Availability: The Repressor of Meiosis, Rme1p, Positively Regulates Invasive Growth in Saccharomyces cerevisiae	10.1093/genetics/165.3.1045	2003	no	quiescent or quiescence wasn't used
Genome-wide monitoring of wine yeast gene expression during alcoholic fermentation	10.1002/yea.1046	2003	no	quiescent or quiescence wasn't used
Defects Arising From Whole-Genome Duplications in Saccharomyces cerevisiae	10.1534/genetics.104.029256	2004	no	quiescent or quiescence wasn't used
Superoxide is a mediator of an altruistic aging program in Saccharomyces cerevisiae	10.1083/jcb.200404002	2004	no	quiescent or quiescence wasn't used
Analysis of Saccharomyces cerevisiae hexose carrier expression during wine fermentation: both low- and high-aﬃnity Hxt transporters are expressed	10.1016/j.femsyr.2004.09.005	2004	no	quiescent or quiescence wasn't used
The Novel Yeast PAS Kinase Rim15 Orchestrates G0-Associated Antioxidant Defense Mechanisms	https://doi.org/10.4161/cc.3.4.791	2004	no	quiescent or quiescence wasn't used
New roles for CDC25 in growth control, galactose regulation and cellular differentiation in Saccharomyces cerevisiae	10.1099/mic.0.27144-0	2004	no	quiescent or quiescence wasn't used
A synthetic lethal screen identifies a role for the cortical actin patch/endocytosis complex in the response to nutrient deprivation in Saccharomyces cerevisiae	10.1534/genetics.166.2.707	2004	no	quiescent or quiescence wasn't used
Proteasome synthesis and assembly are required for survival during stationary phase	10.1016/j.freeradbiomed.2004.05.025	2004	no	quiescent or quiescence wasn't used
Global analysis of nutrient control of gene expression in Saccharomyces cerevisiae during growth and starvation	10.1073/pnas.0308321100	2004	no	quiescent or quiescence wasn't used
The Ras/cAMP-dependent Protein Kinase Signaling Pathway Regulates an Early Step of the Autophagy Process in Saccharomyces cerevisiae	10.1074/jbc.M400272200	2004	no	quiescent or quiescence wasn't used
Sense and sensibility: nutritional response and signal integration in yeast	10.1016/j.mib.2004.10.002	2004	no	wrong article type	Review
Cyclin C/Cdk3 Promotes Rb-Dependent G0 Exit	Cell, Vol. 117, 239–251, April 16, 2004	2004	no	not on S.cerevisiae
GUD1 (YDL238c) encodes Saccharomyces cerevisiae guanine deaminase, an enzyme expressed during post-diauxic growth	Yeast 2004; 21: 1359–1363.	2004	no	quiescent or quiescence wasn't used
“Sleeping Beauty”: Quiescence in Saccharomyces cerevisiae	DOI: 10.1128/MMBR.68.2.187–206.2004	2004	no	wrong article type	review
Movement of Eukaryotic mRNAs Between Polysomes and Cytoplasmic Processing Bodies	10.1126/science.1115791	2005	no	quiescent or quiescence wasn't used
Preferential occupancy of histone variant H2AZ at inactive promoters influences local histone modifications and chromatin remodeling	10.1073 pnas.0507975102	2005	no	quiescent or quiescence wasn't used
Overexpressed Sod1p acts either to reduce or to increase the lifespans and stress resistance of yeast, depending on whether it is Cu 2+ -deficient or an active Cu, Zn-superoxide dismutase	10.1111/j.1474-9728.2005.00142.x	2005	no	quiescent or quiescence wasn't used
Rapamycin pre-treatment preserves viability, ATP level and catabolic capacity during carbon starvation of Saccharomyces cerevisiae	10.1002/yea.1219	2005	no	quiescent or quiescence wasn't used
Epistatic participation of REV1 and REV3 in the formation of UV-induced frameshift mutations in cell cycle-arrested yeast cells	10.1016/j.mrfmmm.2005.07.012	2006	no	quiescent or quiescence wasn't used
Physiological behaviour of Saccharomyces cerevisiae in aerated fed-batch fermentation for high level production of bioethanol	10.1111/j.1567-1364.2006.00152.x	2006	no	quiescent or quiescence wasn't used
Genome-Wide Location of the Coactivator Mediator: Binding without Activation and Transient Cdk8 Interaction on DNA	DOI 10.1016/j.molcel.2006.03.023	2006	no	other	Q data published in previous papaer, here they only compare it to new (exp. phase) data
Preadaptation to efficient respiratory maintenance is essential both for maximal longevity and the retention of replicative potential in chronologically ageing yeast	10.1016/j.mad.2006.05.004	2006	no	quiescent or quiescence wasn't used
The anatomy of microbial cell state transitions in response to oxygen	10.1101/gr.6728007	2007	no	not on S.cerevisiae
Rapamycin-mediated G1 arrest involves regulation of the Cdk inhibitor Sic1 in Saccharomyces cerevisiae	doi:10.1111/j.1365-2958.2007.05599.x	2007	no	quiescent or quiescence wasn't used
Chronological and replicative life-span extension in Saccharomyces cerevisiae by increased dosage of alcohol dehydrogenase 1	DOI 10.1099/mic.0.2007/009340-0	2007	no	quiescent or quiescence wasn't used
The chronological life span of Saccharomyces cerevisiae to study mitochondrial dysfunction and disease	10.1016/j.ymeth.2008.10.004	2008	no	quiescent or quiescence wasn't used
The rate of cell growth is governed by cell cycle stage	10.1101/gad.1777309	2009	no	quiescent or quiescence wasn't used
The yeast MAPK Hog1 is not essential for immediate survival under osmostress	10.1016/j.febslet.2009.05.014	2009	no	quiescent or quiescence wasn't used
Differential localization to cytoplasm, nucleus or P-bodies of yeast PKA subunits under different growth conditions	10.1016/j.ejcb.2009.08.005	2009	no	quiescent or quiescence wasn't used
Quantifying Yeast Chronological Life Span by Outgrowth of Aged Cells	doi:10.3791/1156	2009	no	wrong article type	Protocol
Whi2p links nutritional sensing to actin-dependent Ras-cAMP-PKA regulation and apoptosis in yeast	10.1242/jcs.042424	2009	no	quiescent or quiescence wasn't used
A molecular mechanism of chronological aging in yeast	https://doi.org/10.4161/cc.8.8.8287	2009	no	quiescent or quiescence wasn't used
Genome-wide analysis of DNA turnover and gene expression in stationary-phase Saccharomyces cerevisiae	10.1099/mic.0.035519-0	2010	no	quiescent or quiescence wasn't used
Assessment of chronological lifespan dependent molecular damages in yeast lacking mitochondrial antioxidant genes	10.1016/j.bbrc.2010.08.019	2010	no	quiescent or quiescence wasn't used
Remodeling of the SCF complex-mediated ubiquitination system by compositional alteration of incorporated F-box proteins	10.1002/pmic.200900497	2010	no	quiescent or quiescence wasn't used
Transcriptional regulation in yeast during diauxic shift and stationary phase	10.1089/omi.2010.0069	2010	no	wrong article type	Review
Identification and Inhibitory Properties of a Novel Ca2þ/Calmodulin Antagonist	10.1021/bi1001213	2010	no	not on S.cerevisiae
POLARITY-DRIVEN GEOMETRICAL CLUSTER GROWTH MODEL OF BUDDING YEAST	DOI: 10.1142/S0129183110015749	2010	no	quiescent or quiescence wasn't used
The sweet taste of death: glucose triggers apoptosis during yeast chronological aging	AGING, October 2010, Vol. 2 No 10	2010	no	wrong article type	review
The sweet taste of death: glucose triggers apoptosis during yeast chronological aging	doi: 10.18632/aging.100223	2010	no	wrong article type	review
Proliferation/quiescence: the controversial “aller-retour”	10.1186/1747-1028-6-10	2011	no	wrong article type	Commentary
Proliferation/Quiescence: When to start? Where to stop? What to stock?	10.1186/1747-1028-6-20	2011	no	wrong article type	Commentary
Phosphate and succinate use different mechanisms to inhibit sugar-induced cell death in yeast: insight into the Crabtree effect	10.1074/jbc.M110.209379	2011	no	quiescent or quiescence wasn't used
A Screen for Germination Mutants in Saccharomyces cerevisiae	10.1534/g3.111.000323/-/DC1SI	2011	no	quiescent or quiescence wasn't used
Ethanol fermentation driven by elevated expression of the G1 cyclin gene CLN3 in sake yeast	doi:10.1016/j.jbiosc.2011.08.010	2011	no	quiescent or quiescence wasn't used
Differences in stationary-phase cells of a commercial Saccharomyces cerevisiae wine yeast grown in aerobic and microaerophilic batch cultures assessed by electric particle analysis, light diffraction and flow cytometry	10.1007/s10295-010-0839-x	2011	no	not on S.cerevisiae
Dynamics of oscillatory phenotypes in S. cerevisiae reveal a network of genome-wide transcriptional oscillators	10.1111/j.1742-4658.2012.08508.x	2012	no	quiescent or quiescence wasn't used
Mitochondrial respiratory thresholds regulate yeast chronological life span and its extension by caloric restriction	10.1016/j.cmet.2012.05.013	2012	no	quiescent or quiescence wasn't used
Isonicotinamide Enhances Sir2 Protein-mediated Silencing and Longevity in Yeast by Raising Intracellular NAD+ Concentration*	DOI 10.1074/jbc.M112.367524	2012	no	quiescent or quiescence wasn't used
Desynchronisation of Glycolytic Oscillations in Yeast Cell Populations	doi:10.1371/journal.pone.0043276	2012	no	not on S.cerevisiae
Timing of Transcriptional Quiescence during Gametogenesis Is Controlled by Global Histone H3K4 Demethylation	https://doi.org/10.1016/j.devcel.2012.10.005	2012	no	other	spores
Time course gene expression profiling of yeast spore germination reveals a network of transcription factors orchestrating the global response	10.1186/1471-2164-13-554	2012	no	other	spores
The essenceof yeast quiescence	10.1111/j.1574-6976.2011.00287.x	2012	no	wrong article type	review
Inorganic Pyrophosphatase Defects Lead to Cell Cycle Arrest and Autophagic Cell Death through NAD+ Depletion in Fermenting Yeast	10.1074/jbc.M112.439349	2013	no	quiescent or quiescence wasn't used
Iron, Glucose and Intrinsic Factors Alter Sphingolipid Composition as Yeast Cells Enter Stationary Phase	10.1016/j.bbalip.2012.12.012.	2013	no	quiescent or quiescence wasn't used
Ethanol and Acetate Acting as Carbon/Energy Sources Negatively Affect Yeast Chronological Aging	10.1155/2013/802870	2013	no	quiescent or quiescence wasn't used
Changes in the genome-wide localization pattern of Sir3 in Saccharomyces cerevisiae during different growth stages	10.5936/csbj.201304001	2013	no	quiescent or quiescence wasn't used
Phosphate-Activated Cyclin-Dependent Kinase Stabilizes G1 Cyclin To Trigger Cell Cycle Entry	doi:10.1128/MCB.01556-12	2013	no	quiescent or quiescence wasn't used
tRNAHis 5-methylcytidine levels increase in response to several growth arrest conditions in Saccharomyces cerevisiae	http://www.rnajournal.org/cgi/doi/10.1261/rna.035808.112.	2013	no	quiescent or quiescence wasn't used
Mutually dependent degradation of Ama1p and Cdc20p terminates APC/C ubiquitin ligase activity at the completion of meiotic development in yeast	10.1186/1747-1028-8-9	2013	no	other
Changes in Transcription and Metabolism During the Early Stage of Replicative Cellular Senescence in Budding Yeast	10.1074/jbc.M114.600528	2014	no	quiescent or quiescence wasn't used
Growth Phase-dependent Roles of Sir2 in Oxidative Stress Resistance and Chronological Lifespan in Yeast	10.1007/s12275-014-4173-2	2014	no	quiescent or quiescence wasn't used
Lost in Transition: Start-Up of Glycolysis Yields Subpopulations of Nongrowing Cells	10.1126/science.1245114	2014	no	quiescent or quiescence wasn't used
Saccharomyces cerevisiae biofilm tolerance towards systemic antifungals depends on growth phase	10.1186/s12866-014-0305-4	2014	no	quiescent or quiescence wasn't used
Nuclear Transport of Yeast Proteasomes	https://doi.org/10.3390/biom4040940	2014	no	wrong article type	Review
Tributyltin induces cell cycle arrest at G1 phase in the yeast Saccharomyces cerevisiae	10.2131/jts.39.311	2014	no	quiescent or quiescence wasn't used
Microtubules move the nucleus to quiescence	10.4161/nucl.28538	2014	no	wrong article type	Review
Yeast DJ-1 superfamily members are required for diauxic-shift reprogramming and cell survival in stationary phase	https://doi.org/10.1073/pnas.1319221111	2014	no	quiescent or quiescence wasn't used
Improved ethanol tolerance of Saccharomyces cerevisiae in mixed cultures with Kluyveromyces lactis on high-sugar fermentation	10.1016/j.micres.2014.04.007	2014	no	not on S.cerevisiae	Saccharomyces cerevisiae in mixed cultures with Kluyveromyces
Stationary phase lipophagy as a cellular mechanism to recycle sterols during quiescence	https://doi.org/10.4161/auto.36137	2014	no	wrong article type	review/summary paper
Uncoupling reproduction from metabolism extends chronological lifespan in yeast	10.1073/pnas.1323918111	2014	no	quiescent or quiescence wasn't used
Functional genomic analysis reveals overlapping and distinct features of chronologically long-lived yeast populations	10.18632/aging.100729	2015	no	quiescent or quiescence wasn't used
Comprehensive Temporal Protein Dynamics during the Diauxic Shift in Saccharomyces cerevisiae	https://doi.org/10.1074/mcp.M114.045849	2015	no	quiescent or quiescence wasn't used
Oxygen availability strongly affects chronological lifespan and thermotolerance in batch cultures of Saccharomyces cerevisiae	10.15698/mic2015.11.238	2015	no	quiescent or quiescence wasn't used
Nuclear Import of Yeast Proteasomes	doi:10.3390/cells4030387	2015	no	wrong article type	review
The conserved HDAC Rpd3 drives transcriptional quiescence in S. cerevisiae	http://dx.doi.org/10.1016/j.gdata.2015.10.008	2015	no	wrong article type	methodology description
A molecular off switch for transcriptional quiescence	https://doi.org/10.1080/15384101.2015.1112618	2015	no	wrong article type
Inhibitory Role of Greatwall-Like Protein Kinase Rim15p in Alcoholic Fermentation via Upregulating the UDP-Glucose Synthesis Pathway in Saccharomyces cerevisiae	doi:10.1128/AEM.02977-15.	2015	no	quiescent or quiescence wasn't used
Nitrogen and carbon source balance determines longevity, independently of fermentative or respiratory metabolism in the yeast Saccharomyces cerevisiae	10.18632/oncotarget.8656	2016	no	quiescent or quiescence wasn't used
Gearing up for survival - HSP-containing granules accumulate in quiescent cells and promote survival	10.15698/mic2016.03.481	2016	no	wrong article type	Review
Excess of mutational jackpot events in expanding populations revealed by spatial Luria-Delbrück experiments	10.1038/ncomms12760	2016	no	quiescent or quiescence wasn't used
Phenotypic plasticity within yeast colonies: differential partitioning of cell fates	10.1007/s00294-015-0558-y	2016	no	other	spores
During yeast chronological aging resveratrol supplementation results in a short-lived phenotype Sir2-dependent	10.1016/j.redox.2017.04.015	2017	no	quiescent or quiescence wasn't used
Starvation signals in yeast are integrated to coordinate metabolic reprogramming and stress response to ensure longevity	10.1007/s00294-017-0697-4	2017	no	wrong article type	Review
Ribonucleotides and transcription-associated mutagenesis in yeast	10.1016/j.jmb.2016.08.005	2017	no	wrong article type	Review
Nicotinamide supplementation phenocopies SIR2 inactivation by modulating carbon metabolism and respiration during yeast chronological aging	10.1016/j.mad.2016.06.006	2017	no	quiescent or quiescence wasn't used
A common strategy for initiating the transition from proliferation to quiescence	DOI 10.1007/s00294-016-0640-0	2017	no	wrong article type	review
Pleiotropic functions of the yeast Greatwall-family protein kinase Rim15p: a novel target for the control of alcoholic fermentation	Vol. 81, No. 6, 1061–1068	2017	no	wrong article type	review
Reduction in replication-independent endogenous DNA double-strand breaks promotes genomic instability during chronological aging in yeast	10.1096/fj.201800218RR	2018	no	quiescent or quiescence wasn't used
The paradox of proteasome granules	10.1007/s00294-017-0739-y	2018	no	wrong article type	Letter
Stress response factors drive regrowth of quiescent cells	10.1007/s00294-018-0813-0	2018	no	wrong article type	Review
Preparation and Analysis of Saccharomyces cerevisiae Quiescent Cells	10.1007/978-1-4939-7371-2_9	2018	no	wrong article type	Protocol
Intracellular Mass Density Increase Is Accompanying but Not Sufficient for Stiffening and Growth Arrest of Yeast Cells	https://doi.org/10.3389/fphy.2018.00131	2018	no	quiescent or quiescence wasn't used
N-terminal Acetylation Levels Are Maintained During Acetyl-CoA Deficiency in Saccharomyces cerevisiae	https://doi.org/10.1074/mcp.RA118.000982	2018	no	quiescent or quiescence wasn't used
Natural variation of chronological aging in the Saccharomyces cerevisiae species reveals diet-dependent mechanisms of life span control	10.1038/s41514-018-0022-6	2018	no	quiescent or quiescence wasn't used
Eukaryotic Adaptation to Years-Long Starvation Resembles that of Bacteria	10.1016/j.isci. 2019.08.002	2019	no	quiescent or quiescence wasn't used
Analyses of rRNA gene chromatin in cell cycle arrested Saccharomyces cerevisiae cells	10.1016/j.dib.2019.104083	2019	no	quiescent or quiescence wasn't used
Unraveling quiescence‑specific repressive chromatin domains	10.1007/s00294-019-00985-9	2019	no	wrong article type	review
Diverse conditions support near-zero growth in yeast: Implications for the study of cell lifespan	10.15698/mic2019.09.690	2019	no	wrong article type	Review
Quiescence, an individual journey	10.1007/s00294-018-00928-w	2019	no	wrong article type	review
A Putative Bet-Hedging Strategy Buffers Budding Yeast against Environmental Instability	https://doi.org/10.1016/j.cub.2020.08.092	2020	no	quiescent or quiescence wasn't used
Protein extraction from Saccharomyces cerevisiae at different growth phases	10.1016/j.mimet.2020.105906	2020	no	quiescent or quiescence wasn't used
Reorganization of budding yeast cytoplasm upon energy depletion	https://doi.org/10.1091/mbc.E20-02-0125	2020	no	quiescent or quiescence wasn't used
The budding yeast transition to quiescence	DOI: 10.1002/yea.3546	2020	no	wrong article type	review
Mitophagy Improves Ethanol Tolerance in Yeast: Regulation by Mitochondrial Reactive Oxygen Species in Saccharomyces cerevisiae	10.4014/jmb.2004.04073	2020	no	quiescent or quiescence wasn't used
Early adaptation strategies of Saccharomyces cerevisiae and Torulaspora T delbrueckii to co-inoculation in high sugar grape must-like media	10.1016/j.fm.2020.103463	2020	no	not on S.cerevisiae
Provocation: all yeast cells are born equal, but some grow to be more equal than others	10.1002/jib.647	2021	no	wrong article type	Review/opinion article
Quiescence Through the Prism of Evolution	10.3389/fcell.2021.745069	2021	no	wrong article type	Perspective/review article
Quorum sensing regulates rRNA synthesis in Saccharomyces cerevisiae	10.1016/j.gene.2021.145442	2021	no	quiescent or quiescence wasn't used
Remodelling of Nucleus-Vacuole Junctions During Metabolic and Proteostatic Stress	10.1177/25152564211016608	2021	no	wrong article type	Review
Who gets a license: DNA synthesis in quiescent cells re‑entering the cell cycle	10.1007/s00294-021-01170-7	2021	no	wrong article type	mini-review
Modelling uniaxial non-uniform yeast colony growth: Comparing an agent-based model and continuum approximations	https://doi.org/10.1016/j.jtbi.2021.110715	2021	no	wrong article type	Modeling - no empirical data
Response to Cold: A Comparative Transcriptomic Analysis in Eight Cold-Adapted Yeasts	doi: 10.3389/fmicb.2022.828536	2022	no	quiescent or quiescence wasn't used
Comparative analysis of yeast cell viability at exponential and stationary growth phases	https://doi.org/10.5806/AST.2022.35.4.181	2022	no	quiescent or quiescence wasn't used
Tra1 controls the transcriptional landscape of the aging cell	https://doi.org/10.1093/g3journal/jkac287	2022	no	quiescent or quiescence wasn't used
The Dep1 protein: A new regulator of mitophagy in yeast	https://doi.org/10.1016/j.bbrc.2022.10.052	2022	no	quiescent or quiescence wasn't used
Purine Auxotrophic Starvation Evokes Phenotype Similar to Stationary Phase Cells in Budding Yeast	https://doi.org/10.3390/ jof8010029	2022	no	quiescent or quiescence wasn't used
Morphological Changes in Mitochondria, Mitochondrial Nucleoids, and Actin Cytoskeleton during the Transition from Anaerobic to Aerobic Culture in the Yeast Saccharomyces cerevisiae	DOI: 10.1508/cytologia.87.369	2022	no	quiescent or quiescence wasn't used
Nst1, Densely Associated to P-Body in the Post-Exponential Phases of Saccharomyces cerevisiae, Shows an Intrinsic Potential of Producing Liquid-Like Condensates of P-Body Components in Cells	https://doi.org/ 10.3390/ijms23052501	2022	no	quiescent or quiescence wasn't used
Metabolomics analysis of freeze–thaw tolerance enhancement mechanism of E-poly-L-lysine on industrial yeast	https://doi.org/10.1016/j.foodchem.2022.132315	2022	no	quiescent or quiescence wasn't used
Intron-mediated induction of phenotypic heterogeneity	https://doi.org/10.1038/s41586-022-04633-0	2022	no	quiescent or quiescence wasn't used
Rewiring of the protein–protein–metabolite interactome during the diauxic shift in yeast	https://doi.org/10.1007/s00018-022-04569-8	2022	no	quiescent or quiescence wasn't used
Stress Responses Elicited by Misfolded Proteins Targeted to Mitochondria	https://doi.org/10.1016/j.jmb.2022.167618	2022	no	quiescent or quiescence wasn't used
Moonlighting at the Poles: Non-Canonical Functions of Centrosomes	doi: 10.3389/fcell.2022.930355	2022	no	wrong article type	review
Impact of Chromosomal Context on Origin Selection and the Replication Program	https://doi.org/10.3390/ genes13071244	2022	no	other
Genome-wide screens in yeast models towards understanding chronological lifespan regulation	https://doi.org/10.1093/bfgp/elab011	2022	no	wrong article type	review
Triosephosphate Isomerase and Its Product Glyceraldehyde-3-Phosphate Are Involved in the Regulatory Mechanism That Suppresses Exit from the Quiescent State in Yeast Cells	10.1128/spectrum.00897-22	2022	no	other	spores
Quiescence in Saccharomyces cerevisiae	10.1146/annurev-genet-080320-023632	2022	no	wrong article type	review
