# Supplementary material for: A Systematic Review on Quiescent State Research Approaches in S. cerevisiae
Source: Cells. 2023 Jun 12;12(12):1608. doi: 10.3390/cells12121608 (PMC10297366; doi:10.3390/cells12121608)
Supplement: Supplementary file 1 [file cells-12-01608-s001.zip › QUIESCENCE_included.xlsx]

## Sheet: Metadata
Opalek et al. 2023
A systematic review on quiescent state research approaches in S. cerevisiae
Supplementary File
List of articles included in the systematic review together with the categorization
Each sheet corresponds to one aspect/feature of an article that was analysed

## Sheet: all
ID	Title	DOI	year	include	whole_subpop	starvation_type	Strain	Metabolic profile	Age	Biological aspects
Q_001	Adaptive Roles of SSY1 and SIR3 During Cycles of Growth and Starvation in Saccharomyces cerevisiae Populations Enriched for Quiescent or Nonquiescent Cells	https://doi.org/10.1534/g3.117.041749	2017	yes	subpop	natural_starvation;	laboratory	auxotroph	2 - 4 days (49h - 96h);	Growth phenotypes; Life span; Cell signalling; Other;
Q_002	Investigation of protein expression of Saccharomyces cerevisiae cells in quiescent and proliferating state before and after toxic stress	https://doi.org/10.1080/13102818.2021.1879677	2021	yes	subpop	natural_starvation;	laboratory	auxotroph	4 days - 1 week (+96h, up to 7 days, 168h);	Growth phenotypes; Cell signalling ; Gene expression;
Q_003	Release of extraction-resistant mRNA in stationary phase Saccharomyces cerevisiae produces a massive increase in transcript abundance in response to stress	10.1186/gb-2006-7-2-r9	2006	yes	whole_pop	natural_starvation;	laboratory	auxotroph	4 days - 1 week (+96h, up to 7 days, 168h);	Growth phenotypes; Cell signalling; Gene expression;
Q_004	Deletions associated with stabilization of the Top1 cleavage complex in yeast are products of the nonhomologous end-joining pathway	https://doi.org/10.1073/pnas.1914081116	2019	yes	subpop	natural_starvation;	laboratory	auxotroph	1 - 2 weeks (+7days, up to 14 days);	Genome organization and integrity ;
Q_005	On the Ecological Significance of Phenotypic Heterogeneity in Microbial Populations Undergoing Starvation	10.1128/spectrum.00450-21	2022	yes	subpop	natural_starvation;	laboratory	prototroph	2 - 4 days (49h - 96h);	Life span; Growth phenotypes;
Q_006	Characterization of Differentiated Quiescent and Nonquiescent Cells in Yeast Stationary-Phase Cultures	10.1091/mbc.E07– 07– 0666	2008	yes	subpop	natural_starvation;	laboratory	auxotroph	4 days - 1 week (+96h, up to 7 days, 168h);	Growth phenotypes; Life span; Cell signalling ; Gene expression;
Q_007	A Loss-of-Function Mutation in the PAS Kinase Rim15p Is Related to Defective Quiescence Entry and High Fermentation Rates of Saccharomyces cerevisiae Sake Yeast Strains	doi:10.1128/AEM.00165-12	2012	yes	whole_pop	natural_starvation;abrupt_starvation;	laboratory	not specified	4 days - 1 week (+96h, up to 7 days, 168h);	Growth phenotypes; Cell cycle; Gene expression; Metabolism; Metabolism - Carbon;
Q_008	RSC primes the quiescent genome for hypertranscription upon cell-cycle re-entry	10.7554/eLife.67033	2021	yes	subpop	natural_starvation;	laboratory	prototroph	4 days - 1 week (+96h, up to 7 days, 168h);	Gene expression; Cell cycle;
Q_009	Isolation of quiescent and nonquiescent cells from yeast stationary-phase cultures	http://www.jcb.org/cgi/doi/10.1083/jcb.200604072	2006	yes	subpop	natural_starvation;	laboratory	both	1 - 2 days (24h - 48h);2 - 4 days (49h - 96h);4 days - 1 week (+96h, up to 7 days, 168h);1 - 2 weeks (+7days, up to 14 days);more than 14 days;less than 24h;	Cell’s morphology; Metabolism; Life span; Cell cycle; Gene expression; Growth phenotypes;
Q_010	Isolation of two cell populations from yeast during high-level alcoholic fermentation that resemble quiescent and nonquiescent cells from the stationary phase on glucose	10.1111/j.1567-1364.2009.00553.x	2009	yes	subpop	natural_starvation;	laboratory	prototroph	1 - 2 days (24h - 48h);	Gene expression; Growth phenotypes; Life span; Cell’s morphology; Metabolism - Carbon; Metabolism - Storage materials and other;
Q_011	Mitochondria reorganization upon proliferation arrest predicts individual yeast cell fate	10.7554/eLife.35685	2018	yes	subpop	natural_starvation;	laboratory	auxotroph	4 days - 1 week (+96h, up to 7 days, 168h);	Cell’s morphology; Life span;
Q_012	Ubiquitin orchestrates proteasome dynamics between proliferation and quiescence in yeast	10.1091/mbc.E17-03-0162	2017	yes	whole_pop	natural_starvation;	laboratory	auxotroph	4 days - 1 week (+96h, up to 7 days, 168h);	Cell’s morphology; Gene expression;
Q_013	Antisense transcriptional interference mediates condition-specific gene repression in budding yeast	10.1093/nar/gky342	2018	yes	subpop	natural_starvation;	laboratory	auxotroph	1 - 2 weeks (+7days, up to 14 days);	Gene expression;
Q_014	Spatial reorganization of telomeres in long-lived quiescent cells	10.1186/s13059-015-0766-2	2015	yes	subpop	natural_starvation;abrupt_starvation;	laboratory	auxotroph	1 - 2 weeks (+7days, up to 14 days);	Cell’s morphology; Gene expression; Growth phenotypes; Genome organization and integrity;
Q_015	Antagonism between salicylate and the cAMP signal controls yeast cell survival and growth recovery from quiescence	doi: 10.15698/mic2018.07.640	2018	yes	whole_pop	natural_starvation;	laboratory	auxotroph	not specified / not applicable;	Cell cycle; Growth phenotypes;
Q_016	Differentiated cytoplasmic granule formation in quiescent and non-quiescent cells upon chronological aging	10.15698/mic2016.03.484	2016	yes	subpop	natural_starvation;	laboratory	prototroph	2 - 4 days (49h - 96h);	Cell’s morphology; Growth phenotypes; Cell cycle;
Q_017	Spg5 Protein Regulates the Proteasome in Quiescence	10.1074/jbc.M112.390294	2012	yes	whole_pop	natural_starvation;	laboratory	auxotroph	4 days - 1 week (+96h, up to 7 days, 168h);1 - 2 weeks (+7days, up to 14 days);1 - 2 days (24h - 48h);	Gene expression; Metabolism;
Q_018	In S. cerevisiae hydroxycitric acid antagonizes chronological aging and apoptosis regardless of citrate lyase	https://doi.org/10.1007/s10495-020-01625-1	2020	yes	whole_pop	natural_starvation;	laboratory	auxotroph	not specified / not applicable;	Life span; Growth phenotypes; Cell signalling;
Q_019	Trehalose is a key determinant of the quiescent metabolic state that fuels cell cycle progression upon return to growth	10.1091/mbc.e10-01-0056	2010	yes	subpop	natural_starvation;	laboratory	prototroph	1 - 2 days (24h - 48h);2 - 4 days (49h - 96h);4 days - 1 week (+96h, up to 7 days, 168h);	Growth phenotypes; Metabolism - Storage materials and other;
Q_020	Efﬁcient transition to growth on fermentable carbon sources in Saccharomyces cerevisiae requires signaling through the Ras pathway	10.1093/emboj/17.23.6942	1998	yes	whole_pop	natural_starvation;	laboratory	auxotroph	2 - 4 days (49h - 96h);	Cell signalling; Cell cycle;
Q_021	The role of proteosome-mediated proteolysis in modulating potentially harmful transcription factor activity in Saccharomyces cerevisiae	doi:10.1093/bioinformatics/btr211	2011	yes	whole_pop	abrupt_starvation;	laboratory	auxotroph	2 - 4 days (49h - 96h);	Cell signalling; Growth phenotypes; Gene expression; Cell cycle;
Q_022	NAD(P)HX repair deficiency causes central metabolic perturbations in yeast and human cells	10.1111/febs.14631	2018	yes	whole_pop	natural_starvation;	laboratory	auxotroph	1 - 2 days (24h - 48h);	Cell signalling; Gene expression; Metabolism - Amino-acids and nutrients;
Q_023	Effect of aerobic and microaerophilic culture in the growth dynamics of Saccharomyces cerevisiae and in training of quiescent and non‑quiescent subpopulations	DOI 10.1007/s00203-015-1136-x	2015	yes	subpop	natural_starvation;	non-laboratory	not specified	1 - 2 weeks (+7days, up to 14 days);4 days - 1 week (+96h, up to 7 days, 168h);	Growth phenotypes; Cell’s morphology; Metabolism - Carbon;
Q_024	Caloric restriction extends yeast chronological lifespan via a mechanism linking cellular aging to cell cycle regulation, maintenance of a quiescent state, entry into a non-quiescent state and survival in the non-quiescent state	10.18632/oncotarget.20614	2017	yes	subpop	natural_starvation;	laboratory	auxotroph	4 days - 1 week (+96h, up to 7 days, 168h);1 - 2 weeks (+7days, up to 14 days);more than 14 days;	Genome organization and integrity; Metabolism - Storage materials and other; Metabolism - Carbon; Cell’s morphology; Growth phenotypes; Life span; Cell cycle;
Q_025	Decreased cellular permeability to H2O2 protects Saccharomyces cerevisiae cells in stationary phase against oxidative stress	10.1016/j.febslet.2004.10.090	2004	yes	whole_pop	natural_starvation;	laboratory	auxotroph	4 days - 1 week (+96h, up to 7 days, 168h);	Growth phenotypes;
Q_026	Non-Coding, RNAPII-Dependent Transcription at the Promoters of rRNA Genes Regulates Their Chromatin State in S. cerevisiae	10.3390/ncrna7030041	2021	yes	whole_pop	natural_starvation;	laboratory	auxotroph	1 - 2 weeks (+7days, up to 14 days);	Gene expression;
Q_027	Budding Yeast SSD1-V Regulates Transcript Levels of Many Longevity Genes and Extends Chronological Life Span in Puriﬁed Quiescent Cells	10.1091/mbc.E09 – 04 – 0347	2009	yes	subpop	natural_starvation;abrupt_starvation;	laboratory	prototroph	4 days - 1 week (+96h, up to 7 days, 168h);1 - 2 weeks (+7days, up to 14 days);more than 14 days;	Life span; Gene expression; Cell cycle;
Q_028	Saccharomyces cerevisiae in the stationary phase as a model organism--characterization at cellular and proteome level	10.1016/j.jprot.2011.06.026	2011	yes	whole_pop	natural_starvation;	laboratory	prototroph	less than 24h;1 - 2 days (24h - 48h);2 - 4 days (49h - 96h);4 days - 1 week (+96h, up to 7 days, 168h);1 - 2 weeks (+7days, up to 14 days);more than 14 days;	Growth phenotypes; Metabolism - Storage materials and other; Gene expression; Metabolism - Carbon;
Q_029	Lithocholic acid extends longevity of chronologically aging yeast only if added at certain critical periods of their lifespan	http://dx.doi.org/10.4161/cc.21754	2012	yes	whole_pop	natural_starvation;	laboratory	auxotroph	not specified / not applicable;	Cell cycle; Life span; Growth phenotypes; Genome organization and integrity;
Q_030	Chromatin structure restricts origin utilization when quiescent cells re-enter the cell cycle	https://doi.org/10.1093/nar/gkaa1148	2021	yes	subpop	natural_starvation;abrupt_starvation;	laboratory	auxotroph	4 days - 1 week (+96h, up to 7 days, 168h);	Cell cycle; Genome organization and integrity; Gene expression;
Q_031	Replication-independent instability of Friedreich’s ataxia GAA repeats during chronological aging	https://doi.org/10.1073/pnas.2013080118	2021	yes	subpop	natural_starvation;	laboratory	auxotroph	2 - 4 days (49h - 96h);	Genome organization and integrity;
Q_032	Key events during the transition from rapid growth to quiescence in budding yeast require posttranscriptional regulators	10.1091/mbc.E13-05-0241	2013	yes	subpop	natural_starvation;	laboratory	prototroph	4 days - 1 week (+96h, up to 7 days, 168h);	Growth phenotypes; Metabolism - Storage materials and other; Cell’s morphology; Life span; Cell cycle;
Q_033	Distinct histone methylation and transcription profiles are established during the development of cellular quiescence in yeast	10.1186/s12864-017-3509-9	2017	yes	subpop	natural_starvation;	laboratory	auxotroph	4 days - 1 week (+96h, up to 7 days, 168h);1 - 2 weeks (+7days, up to 14 days);2 - 4 days (49h - 96h);	Gene expression; Genome organization and integrity;
Q_034	A Genetic Screen for Saccharomyces cerevisiae Mutants That Fail to Enter Quiescence	10.1534/g3.115.019091/-/DC1	2015	yes	subpop	natural_starvation;	laboratory	both	less than 24h;2 - 4 days (49h - 96h);1 - 2 days (24h - 48h);4 days - 1 week (+96h, up to 7 days, 168h);	Other; Life span; Cell cycle;
Q_035	A prion-like domain of Tpk2 catalytic subunit of protein kinase A modulates P-body formation in response to stress in budding yeast	https://doi.org/10.1016/j.bbamcr.2020.118884	2020	yes	whole_pop	abrupt_starvation;	laboratory	both	2 - 4 days (49h - 96h);4 days - 1 week (+96h, up to 7 days, 168h);1 - 2 weeks (+7days, up to 14 days);	Metabolism - Storage materials and other; Cell’s morphology; Gene expression; Cell signalling;
Q_036	Menadione and hydrogen peroxide trigger specific alterations in RNA polymerases profiles in quiescent Saccharomyces cerevisiae cells	https://doi.org/10.1080/13102818.2021.1941255	2021	yes	subpop	natural_starvation;	laboratory	auxotroph	4 days - 1 week (+96h, up to 7 days, 168h);	Cell signalling; Gene expression;
Q_037	Stb3 Binds to Ribosomal RNA Processing Element Motifs That Control Transcriptional Responses to Growth in Saccharomyces cerevisiae	10.1074/jbc.M704762200	2007	yes	whole_pop	natural_starvation;	laboratory	auxotroph	2 - 4 days (49h - 96h);	Cell cycle; Cell signalling; Gene expression; Metabolism - Carbon
Q_038	Genetic interaction profiles of regulatory kinases differ between environmental conditions and cellular states	10.15252/msb.20199167	2020	yes	whole_pop	natural_starvation;	laboratory	prototroph	less than 24h;1 - 2 days (24h - 48h);2 - 4 days (49h - 96h);4 days - 1 week (+96h, up to 7 days, 168h);1 - 2 weeks (+7days, up to 14 days);more than 14 days;	Growth phenotypes; Life span; Cell signalling;
Q_039	Long-Living Budding Yeast Cell Subpopulation Induced by Ethanol/Acetate and Respiration	10.1093/gerona/glz20	2020	yes	subpop	natural_starvation;abrupt_starvation;	laboratory	auxotroph	2 - 4 days (49h - 96h);	Growth phenotypes; Life span; Cell cycle; Cell signalling; Gene expression; Cell’s morphology; Metabolism - Carbon; Metabolism - Amino-acids and nutrients; Metabolism - Storage materials and other;
Q_040	Sake yeast strains have difficulty in entering a quiescent state after cell growth cessation	10.1016/j.jbiosc.2011.03.001	2011	yes	whole_pop	natural_starvation;	non-laboratory;laboratory;	not specified	1 - 2 days (24h - 48h);4 days - 1 week (+96h, up to 7 days, 168h);more than 14 days;	Growth phenotypes; Life span; Metabolism - Carbon;
Q_041	Hsp90 Nuclear Accumulation in Quiescence Is Linked to Chaperone Function and Spore Development in Yeast	10.1091/mbc.E09 – 05– 0376	2009	yes	whole_pop	natural_starvation;	laboratory;	auxotroph	2 - 4 days (49h - 96h);	Growth phenotypes; Cell’s morphology; Cell cycle; Gene expression;
Q_042	Extreme calorie restriction in yeast retentostats induces uniform non-quiescent growth arrest	http://dx.doi.org/10.1016/j.bbamcr.2016.11.002	2016	yes	whole_pop	natural_starvation	laboratory;	prototroph	more than 14 days;1 - 2 weeks (+7days, up to 14 days);4 days - 1 week (+96h, up to 7 days, 168h);2 - 4 days (49h - 96h);less than 24h;	Metabolism - Storage materials and other; Metabolism - Carbon; Cell cycle; Growth phenotypes; Cell’s morphology; Gene expression; Life span;
Q_043	Integration of Multiple Metabolic Signals Determines Cell Fate Prior to Commitment	https://doi.org/10.1016/j.molcel.2018.07.041	2018	yes	whole_pop	abrupt_starvation;	laboratory;	auxotroph	1 - 2 days (24h - 48h);2 - 4 days (49h - 96h);	Cell cycle; Cell signalling; Cell’s morphology; Metabolism - Carbon; Metabolism - Amino-acids and nutrients; Metabolism - Storage materials and other;
Q_044	Aging defined by a chronologic–replicative protein network in Saccharomyces cerevisiae: An interactome analysis	doi:10.1016/j.mad.2009.04.005	2009	yes	whole_pop	NA	no-idea;	not specified	not specified / not applicable;	Cell signalling; Gene expression;
Q_045	Intragenic repeat expansion in the cell wall protein gene HPF1 controls yeast chronological aging	doi:10.1101/gr.253351.119	2020	yes	subpop	natural_starvation;	laboratory;	both	4 days - 1 week (+96h, up to 7 days, 168h);more than 14 days;	Growth phenotypes; Life span; Gene expression; Other;
Q_046	Hypersensitive SSY1 mutations negatively influence transition to quiescence in yeast Saccharomyces cerevisiae	10.1002/yea.3536	2020	yes	subpop	natural_starvation;	laboratory;	prototroph	2 - 4 days (49h - 96h);	Cell signalling; Metabolism - Amino-acids and nutrients; Cell cycle;
Q_047	Chromosome or chromatin condensation leads to meiosis or apoptosis in stationary yeast (Saccharomyces cerevisiae) cells	DOI:10.1111/j.1567-1364.2006.00123.x	2006	yes	subpop	natural_starvation;	laboratory;	auxotroph	1 - 2 days (24h - 48h);2 - 4 days (49h - 96h);4 days - 1 week (+96h, up to 7 days, 168h);	Genome organization and integrity; Cell’s morphology;
Q_048	Altered Lipid Synthesis by Lack of Yeast Pah1 Phosphatidate Phosphatase Reduces Chronological Life Span	10.1074/jbc.M115.680314	2015	yes	whole_pop	natural_starvation;	laboratory;	auxotroph	2 - 4 days (49h - 96h);	Life span; Growth phenotypes; Cell’s morphology; Metabolism - Storage materials and other; Metabolism - Carbon;
Q_049	Cellular responses of Saccharomyces cerevisiae at near-zero growth rates: transcriptome analysis of anaerobic retentostat cultures	DOI: 10.1111/j.1567-1364.2011.00750.x	2011	yes	whole_pop	natural_starvation	laboratory;	prototroph	less than 24h;4 days - 1 week (+96h, up to 7 days, 168h);1 - 2 weeks (+7days, up to 14 days);more than 14 days;	Metabolism - Storage materials and other; Gene expression; Growth phenotypes; Cell signalling; Cell’s morphology; Life span; Cell cycle;
Q_050	Inhibition of transcription leads to rewiring of locus-specific chromatin proteomes	10.1101/gr.256255.119	2020	yes	whole_pop; subpop	natural_starvation;abrupt_starvation;	laboratory;	auxotroph	4 days - 1 week (+96h, up to 7 days, 168h);	Gene expression; Genome organization and integrity;
Q_051	Nano-electrospray tandem mass spectrometric analysis of the acetylation state of histones H3 and H4 in stationary phase in Saccharomyces cerevisiae	10.1186/1471-2091-12-34	2011	yes	whole_pop	natural_starvation;	laboratory;	auxotroph	4 days - 1 week (+96h, up to 7 days, 168h);	Genome organization and integrity;
Q_052	Phosphoproteomic responses of TORC1 target kinases reveal discrete and convergent mechanisms that orchestrate the quiescence program in yeast	https://doi.org/10.1016/j.celrep.2021.110149	2021	yes	whole_pop	abrupt_starvation;	laboratory;	auxotroph	not specified / not applicable;	Cell signalling; Gene expression;
Q_053	The proteomics of quiescent and nonquiescent cell differentiation in yeast stationary-phase cultures	http://www .molbiolcell.org/cgi/doi/10.1091/mbc.E10-06-0499	2011	yes	subpop	natural_starvation;	laboratory;	auxotroph	4 days - 1 week (+96h, up to 7 days, 168h);	Gene expression; Metabolism - Carbon;
Q_054	Chronological Lifespan in Yeast Is Dependent on the Accumulation of Storage Carbohydrates Mediated by Yak1, Mck1 and Rim15 Kinases	e1006458. doi:10.1371/journal.pgen.1006458	2016	yes	whole_pop	natural_starvation;	laboratory;	auxotroph	2 - 4 days (49h - 96h);	Growth phenotypes; Life span; Cell cycle; Cell signalling; Gene expression; Metabolism - Storage materials and other;
Q_055	Glucose, Nitrogen, and Phosphate Repletion in Saccharomyces cerevisiae: Common Transcriptional Responses to Different Nutrient Signals	doi: 10.1534/g3.112.002808	2012	yes	whole_pop	natural_starvation;	laboratory;	both	2 - 4 days (49h - 96h);	Cell signalling; Gene expression;
Q_056	A glycolytic burst drives glucose induction of global histone acetylation by picNuA4 and SAGA	doi:10.1093/nar/gkp270	2009	yes	whole_pop	natural_starvation;	laboratory;	auxotroph	1 - 2 weeks (+7days, up to 14 days);	Genome organization and integrity; Metabolism - Carbon;
Q_057	Cisplatin-mediated DNA double-strand breaks in replicating but not in quiescent cells of the yeast Saccharomyces cerevisiae	doi:10.1016/j.tox.2005.04.015	2005	yes	whole_pop	natural_starvation;	laboratory;	not specified	not specified / not applicable;	Genome organization and integrity;
Q_058	Xbp1 Directs Global Repression of Budding Yeast Transcription during the Transition to Quiescence and Is Important for the Longevity and Reversibility of the Quiescent State	doi:10.1371/journal.pgen.1003854	2013	yes	subpop	natural_starvation;	laboratory;	prototroph	4 days - 1 week (+96h, up to 7 days, 168h);	Life span; Cell cycle; Cell signalling; Gene expression;
Q_059	Caloric restriction extends yeast chronological lifespan by altering a pattern of age-related changes in trehalose concentration	10.3389/fphys.2012.00256	2012	yes	subpop	natural_starvation;	laboratory;	auxotroph	1 - 2 weeks (+7days, up to 14 days);more than 14 days;	Metabolism - Storage materials and other; Life span; Metabolism - Carbon; Cell signalling; Growth phenotypes;
Q_060	System-Level Analysis of Genes and Functions Affecting Survival During Nutrient Starvation in Saccharomyces cerevisiae	10.1534/genetics.110.120766	2010	yes	whole_pop	natural_starvation;abrupt_starvation;	laboratory;	auxotroph	less than 24h;1 - 2 days (24h - 48h);2 - 4 days (49h - 96h);4 days - 1 week (+96h, up to 7 days, 168h);1 - 2 weeks (+7days, up to 14 days);more than 14 days;	Life span; Other; Cell’s morphology;
Q_061	Encapsulation of S. cerevisiae in Poly(glycerol) Silicate Derived Matrices: Effect of Matrix Additives and Cell Metabolic Phase on Long-Term Viability and Rate of Gene Expression	dx.doi.org/10.1021/cm103525u	2011	yes	whole_pop	abrupt_starvation;	no-idea;	not specified	1 - 2 weeks (+7days, up to 14 days);	Life span; Gene expression; Other;
Q_062	DNA topoisomerase II is required for the G0-to-S phase transition in Drosophila Schneider cells, but not in yeast	DOI: 10.1111/j.1365-2443.2004.00783.x	2004	yes	whole_pop	natural_starvation;abrupt_starvation;	laboratory;	auxotroph	1 - 2 weeks (+7days, up to 14 days);	Growth phenotypes; Cell cycle;
Q_063	A Whole Genome Screen for Minisatellite Stability Genes in Stationary-Phase Yeast Cells	10.1534/g3.112.005397	2013	yes	whole_pop	natural_starvation;	laboratory;	auxotroph	1 - 2 weeks (+7days, up to 14 days);	Genome organization and integrity; Other;
Q_064	Sub1 and Maf1, Two Effectors of RNA Polymerase III, Are Involved in the Yeast Quiescence Cycle	10.1371/journal.pone.0114587	2014	yes	whole_pop	natural_starvation;	laboratory;	auxotroph	not specified / not applicable;	Life span; Cell cycle; Gene expression; Cell signalling; Growth phenotypes;
Q_065	Snf1/AMPK promotes the formation of Kog1/Raptor-bodies to increase the activation threshold of TORC1 in budding yeast	DOI: 10.7554/eLife.09181	2015	yes	whole_pop	abrupt_starvation;	laboratory;	auxotroph	not specified / not applicable;	Cell signalling; Gene expression; Cell’s morphology;
Q_066	Novel Checkpoint Pathway Organization Promotes Genome Stability in Stationary-Phase Yeast Cells	doi:10.1128/MCB.05831-11	2013	yes	whole_pop	natural_starvation;	laboratory;	auxotroph	1 - 2 weeks (+7days, up to 14 days);	Genome organization and integrity; Cell signalling;
Q_067	Monitoring single-cell dynamics of entry into quiescence during an unperturbed life cycle	DOI: https:// doi. org/ 10. 7554/ eLife. 73186	2021	yes	whole_pop	natural_starvation;	laboratory;	auxotroph	2 - 4 days (49h - 96h);	Cell cycle; Cell’s morphology;
Q_068	Genomic Analysis of Stationary-Phase and Exit in Saccharomyces cerevisiae: Gene Expression and Identification of Novel Essential Genes	doi/10.1091/mbc.E03–11–0856.	2004	yes	whole_pop	natural_starvation;	laboratory;	prototroph	4 days - 1 week (+96h, up to 7 days, 168h);	Cell cycle; Cell signalling; Gene expression;
Q_069	Autophagy is required for G1/G0 quiescence in response to nitrogen starvation in Saccharomyces cerevisiae	10.4161/auto.32122	2014	yes	whole_pop	natural_starvation;	laboratory;	auxotroph	less than 24h;	Growth phenotypes; Metabolism - Storage materials and other; Cell cycle;
Q_070	Yeast Endosulfines Control Entry into Quiescence and Chronological Life Span by Inhibiting Protein Phosphatase 2A	https://doi.org/10.1016/j.celrep.2012.11.025	2013	yes	whole_pop	abrupt_starvation;	laboratory;	auxotroph	4 days - 1 week (+96h, up to 7 days, 168h);	Cell signalling; Life span; Gene expression;
Q_071	SOD1 oxidation and formation of soluble aggregates in yeast: Relevance to sporadic ALS development	http://dx.doi.org/10.1016/j.redox.2014.03.005	2014	yes	whole_pop	natural_starvation;abrupt_starvation;	laboratory;	auxotroph	2 - 4 days (49h - 96h);	Gene expression;
Q_072	Nutritional Control of Chronological Aging and Heterochromatin in Saccharomyces cerevisiae	doi: 10.1534/genetics.116.196485	2017	yes	whole_pop	natural_starvation;	laboratory;	auxotroph	not specified / not applicable;	Life span; Cell signalling; Metabolism - Carbon;
Q_073	Repair of Intermediate Structures Produced at DNA Interstrand Cross-Links in Saccharomyces cerevisiae	doi: 10.1128/MCB.20.10.3425-3433.2000	2000	yes	whole_pop	natural_starvation;	laboratory;	auxotroph	2 - 4 days (49h - 96h);	Growth phenotypes; Genome organization and integrity; Cell signalling;
Q_074	Skp1-Cullin-F-box-dependent Degradation of Aah1p Requires Its Interaction with the F-box Protein Saf1p	10.1074/jbc.M702425200	2007	yes	whole_pop	natural_starvation;	laboratory;	auxotroph	2 - 4 days (49h - 96h);	Gene expression; Metabolism - Storage materials and other;
Q_075	Genome-Wide Screen in Saccharomyces cerevisiae Identifies Vacuolar Protein Sorting, Autophagy, Biosynthetic, and tRNA Methylation Genes Involved in Life Span Regulation	10.1371/journal.pgen.1001024	2010	yes	whole_pop	natural_starvation;	laboratory;	auxotroph	2 - 4 days (49h - 96h);	Growth phenotypes; Life span; Cell cycle; Other;
Q_076	Three-Dimensional Encapsulation of Saccharomyces cerevisiae in Silicate Matrices Creates Distinct Metabolic States as Revealed by Gene Chip Analysis	10.1021/acsnano.6b06385	2017	yes	whole_pop	abrupt_starvation;	laboratory;	prototroph	4 days - 1 week (+96h, up to 7 days, 168h);	Cell’s morphology; Gene expression;
Q_077	Minisatellite Alterations in ZRT1 Mutants Occur via RAD52- dependent and RAD52-independent Mechanisms in Quiescent Stationary Phase Yeast Cells	10.1016/j.dnarep.2011.03.002	2011	yes	subpop	natural_starvation;	laboratory;	auxotroph	4 days - 1 week (+96h, up to 7 days, 168h);	Genome organization and integrity;
Q_078	The cAMP-DependentProtein Kinase Signaling Pathway Is a Key Regulator of P Body Foci Formation	DOI 10.1016/j.molcel.2011.06.032	2011	yes	whole_pop	abrupt_starvation;natural_starvation;	laboratory;	auxotroph	not specified / not applicable;	Life span; Cell signalling; Gene expression; Cell’s morphology;
Q_079	m:Explorer: multinomial regression models reveal positive and negative regulators of longevity in yeast quiescence	https://doi.org/10.1186/gb-2012-13-6-r55	2012	yes	whole_pop	natural_starvation;	laboratory;	auxotroph	4 days - 1 week (+96h, up to 7 days, 168h);	Life span; Cell signalling;
Q_080	Cellular conditions that modulate the fungicidal activity of occidiofungin	DOI: 10.1111/jam.13496	2017	yes	whole_pop	natural_starvation;	laboratory;	auxotroph	2 - 4 days (49h - 96h);	Growth phenotypes;
Q_081	Low doses of DNA damaging agents extend Saccharomyces cerevisiae chronological lifespan by promoting entry into quiescence	doi:10.1016/j.exger.2018.04.020.	2018	yes	subpop	natural_starvation;	laboratory;	auxotroph	2 - 4 days (49h - 96h);	Growth phenotypes; Life span; Cell cycle; Genome organization and integrity; Gene expression;
Q_082	Global Promoter Targeting of a Conserved Lysine Deacetylase for Transcriptional Shutoff during Quiescence Entry	http://dx.doi.org/10.1016/j.molcel.2015.07.014	2015	yes	subpop	natural_starvation;	laboratory;	prototroph	4 days - 1 week (+96h, up to 7 days, 168h);	Life span; Cell cycle; Genome organization and integrity; Gene expression;
Q_083	Enzymatic transfer of acetate on histones from lysine reservoir sites to lysine activating sites	DOI: 10.1126/sciadv.abj5688	2022	yes	whole_pop	natural_starvation;abrupt_starvation;	laboratory;	not specified	4 days - 1 week (+96h, up to 7 days, 168h);	Genome organization and integrity; Gene expression;
Q_084	Histone Methylation Has Dynamics Distinct from Those of Histone Acetylation in Cell Cycle Reentry from Quiescence	doi:10.1128/MCB.00763-14	2014	yes	whole_pop	natural_starvation;	laboratory;	auxotroph	2 - 4 days (49h - 96h);	Cell cycle; Genome organization and integrity; Gene expression;
Q_085	The yeast genome undergoes significant topological reorganization in quiescence	doi: 10.1093/nar/gkv723	2015	yes	whole_pop	abrupt_starvation;	laboratory;	both	1 - 2 days (24h - 48h);	Genome organization and integrity; Cell’s morphology;
Q_086	A multiple network learning approach to capture system-wide condition-specific responses	doi:10.1093/bioinformatics/btr270	2011	yes	subpop	NA	no-idea;	not specified	not specified / not applicable;	Cell signalling;
Q_087	Phosphate Restriction Promotes Longevity via Activation of Autophagy and the Multivesicular Body Pathway	10.3390/cells10113161	2021	yes	whole_pop	natural_starvation;	laboratory;	auxotroph	less than 24h;	Life span; Cell signalling; Gene expression; Cell’s morphology; Metabolism - Amino-acids and nutrients; Metabolism - Storage materials and other;
Q_088	The stress-activated protein kinase Hog1 develops a critical role after resting state	10.1111/j.1365-2958.2011.07585.x	2011	yes	whole_pop	natural_starvation;	laboratory;	auxotroph	2 - 4 days (49h - 96h);	Growth phenotypes; Cell cycle; Cell signalling; Gene expression; Metabolism - Carbon;
Q_089	Proteasome- and SCF-dependent degradation of yeast adenine deaminase upon transition from proliferation to quiescence requires a new F-box protein named Saf1p	10.1111/j.1365-2958.2006.05153.x	2006	yes	whole_pop	natural_starvation;	laboratory;	both	2 - 4 days (49h - 96h);	Growth phenotypes; Cell signalling; Gene expression; Metabolism - Carbon; Metabolism - Amino-acids and nutrients; Metabolism - Storage materials and other;
Q_090	Yeast cells can access distinct quiescent states	10.1101/gad.2011311	2011	yes	whole_pop	natural_starvation;	laboratory;	prototroph	2 - 4 days (49h - 96h);4 days - 1 week (+96h, up to 7 days, 168h);	Growth phenotypes; Life span; Cell signalling; Gene expression; Metabolism - Carbon; Metabolism - Amino-acids and nutrients; Metabolism - Storage materials and other;
Q_091	The Protein Kinase C Pathway Is Required for Viability in Quiescence in Saccharomyces cerevisiae	https://doi.org/10.1016/S0960-9822(02)00760-1	2002	yes	whole_pop	natural_starvation;abrupt_starvation;	laboratory;	auxotroph	less than 24h;	Growth phenotypes; Life span; Cell signalling; Gene expression; Metabolism - Carbon; Metabolism - Amino-acids and nutrients;
Q_092	Extreme calorie restriction and energy source starvation in Saccharomyces cerevisiae represent distinct physiological states	https://doi.org/10.1016/j.bbamcr.2011.07.008	2011	yes	whole_pop	natural_starvation	laboratory;	prototroph	more than 14 days;	Growth phenotypes; Life span; Gene expression; Cell’s morphology; Metabolism - Carbon; Metabolism - Storage materials and other;
Q_093	Functions of Saccharomyces cerevisiae Ecm27p, a putative Na+/Ca2+ exchanger, in calcium homeostasis, carbohydrate storage and cell cycle reentry from the quiescent phase	https://doi.org/10.1016/j.micres.2016.03.007	2016	yes	whole_pop	natural_starvation;	laboratory;	auxotroph	1 - 2 days (24h - 48h);2 - 4 days (49h - 96h);4 days - 1 week (+96h, up to 7 days, 168h);	Life span; Cell cycle; Cell signalling; Metabolism - Storage materials and other; Metabolism - Amino-acids and nutrients; Metabolism - Carbon;
Q_094	Defective quiescence entry promotes the fermentation performance of bottom-fermenting brewer's yeast	10.1016/j.jbiosc.2016.04.007	2016	yes	whole_pop	natural_starvation;	laboratory;non-laboratory;	auxotroph	4 days - 1 week (+96h, up to 7 days, 168h);	Cell cycle; Metabolism - Carbon;
Q_095	Msn2/4 regulate expression of glycolytic enzymes and control transition from quiescence to growth	10.7554/eLife.29938	2017	yes	whole_pop	natural_starvation;	laboratory;	not specified	not specified / not applicable;	Cell signalling; Gene expression; Metabolism - Carbon;
Q_096	A minimal “push–pull” bistability model explains oscillations between quiescent and proliferative cell states - PMC (nih.gov)	10.1091/mbc.E18-01-0017	2018	yes	whole_pop	natural_starvation	laboratory;	not specified	not specified / not applicable;	Cell cycle; Cell signalling; Metabolism - Carbon;
Q_097	Polarized Growth in the Absence of F-Actin in Saccharomyces cerevisiae Exiting Quiescence	doi:10.1371/journal.pone.0002556	2008	yes	whole_pop	natural_starvation;	laboratory;	auxotroph	4 days - 1 week (+96h, up to 7 days, 168h);	Growth phenotypes; Cell cycle; Cell signalling; Cell’s morphology;
Q_098	Actin Bodies in Yeast Quiescent Cells: An Immediately Available Actin Reserve?	doi: 10.1091/mbc.E06-04-0282	2006	yes	whole_pop	natural_starvation;	laboratory;	both	4 days - 1 week (+96h, up to 7 days, 168h);	Cell cycle; Gene expression; Cell’s morphology;
Q_099	Guanylic nucleotide starvation affects Saccharomyces cerevisiae mother-daughter separation and may be a signal for entry into quiescence	https://doi.org/10.1186/1471-2121-6-24	2005	yes	whole_pop	abrupt_starvation;natural_starvation;	laboratory;	auxotroph	not specified / not applicable;	Growth phenotypes; Cell cycle; Cell signalling; Cell’s morphology; Metabolism - Amino-acids and nutrients;
Q_100	Genome-Wide Analyses Reveal RNA Polymerase II Located Upstream of Genes Poised for Rapid Response upon S. cerevisiae Stationary Phase Exit	DOI 10.1016/j.molcel.2005.03.010	2005	yes	whole_pop	natural_starvation;	laboratory;	auxotroph	1 - 2 weeks (+7days, up to 14 days);	Cell cycle; Cell signalling; Gene expression;
Q_101	Density separation of quiescent yeast using iodixanol	doi 10.2144/000114596	2017	yes	subpop	natural_starvation;	laboratory;	prototroph	4 days - 1 week (+96h, up to 7 days, 168h);	Growth phenotypes; Cell’s morphology;
Q_102	The Yeast GSK-3 Homologue Mck1 Is a Key Controller of Quiescence Entry and Chronological Lifespan	doi:10.1371/journal.pgen.1005282	2014	yes	whole_pop	natural_starvation;	laboratory;	auxotroph	1 - 2 days (24h - 48h);2 - 4 days (49h - 96h);	Growth phenotypes; Life span; Cell cycle; Cell signalling; Gene expression; Cell’s morphology; Metabolism - Storage materials and other;
Q_103	Pretreatment of chemically-synthesized Aβ42 affects its biological activity in yeast	https://doi.org/10.4161/19336896.2014.992275	2014	yes	subpop	natural_starvation;	laboratory;	auxotroph	4 days - 1 week (+96h, up to 7 days, 168h);	Growth phenotypes; Cell’s morphology;
Q_104	Caloric restriction causes a distinct reorganization of the lipidome in quiescent and non-quiescent cells of budding yeast	DOI: 10.18632/oncotarget.28133	2021	yes	subpop	natural_starvation;	laboratory;	auxotroph	1 - 2 days (24h - 48h);2 - 4 days (49h - 96h);4 days - 1 week (+96h, up to 7 days, 168h);1 - 2 weeks (+7days, up to 14 days);more than 14 days;	Life span; Cell signalling; Metabolism - Storage materials and other;
Q_105	Plasticity of death rates in stationary phase in Saccharomyces cerevisiae	Doi: 10.1111/j.1474-9726.2008.00446.x	2009	yes	subpop	natural_starvation;	laboratory;	both	not specified / not applicable;	Life span;
Q_106	Ssd1 and the cell wall integrity pathway promote entry, maintenance, and recovery from quiescence in budding yeast	doi: 10.1091/mbc.E19-04-0190	2019	yes	subpop	natural_starvation;	laboratory;	prototroph	4 days - 1 week (+96h, up to 7 days, 168h);	Growth phenotypes; Life span; Cell cycle; Cell signalling; Metabolism - Storage materials and other;
Q_107	Msa1 and Msa2 Modulate G1-Specific Transcription to Promote G1 Arrest and the Transition to Quiescence in Budding Yeast	DOI:10.1371/journal.pgen.1006088	2016	yes	subpop	natural_starvation;	laboratory;	prototroph	4 days - 1 week (+96h, up to 7 days, 168h);	Cell cycle; Cell signalling; Gene expression; Cell’s morphology;
Q_108	Quantitative proteomic comparison of stationary/G0 phase cells and tetrads in budding yeast	10.1038/srep32031	2016	yes	whole_pop	natural_starvation;abrupt_starvation;	laboratory;	prototroph	4 days - 1 week (+96h, up to 7 days, 168h);	Growth phenotypes; Life span; Cell cycle; Gene expression; Cell’s morphology;
Q_109	Misfolding-prone proteins are reversibly sequestered to an Hsp42-associated granule upon chronological aging	https://doi.org/10.1242/jcs.220202	2018	yes	whole_pop	natural_starvation;	laboratory;	prototroph	4 days - 1 week (+96h, up to 7 days, 168h);	Growth phenotypes; Life span; Gene expression; Cell’s morphology;
Q_110	Reversible cytoplasmic localization of the proteasome in quiescent yeast cells	10.1083/jcb.200711154	2008	yes	whole_pop	natural_starvation;	laboratory;	auxotroph	2 - 4 days (49h - 96h);	Growth phenotypes; Life span; Cell’s morphology; Metabolism - Carbon; Metabolism - Storage materials and other;
Q_111	Metabolic status rather than cell cycle signals control quiescence entry and exit	10.1083/jcb.201009028	2011	yes	whole_pop	natural_starvation;	laboratory;	auxotroph	4 days - 1 week (+96h, up to 7 days, 168h);	Growth phenotypes; Cell cycle; Cell’s morphology; Metabolism - Carbon;
Q_112	An array of nuclear microtubules reorganizes the budding yeast nucleus during quiescence	https://doi.org/10.1083/jcb.201306075	2013	yes	whole_pop	natural_starvation;	laboratory;	auxotroph	2 - 4 days (49h - 96h);	Life span; Cell signalling; Cell’s morphology;
Q_113	Quiescent Saccharomyces cerevisiae forms telomere hyperclusters at the nuclear membrane vicinity through a multifaceted mechanism involving Esc1, the Sir complex, and chromatin condensation	https://doi.org/10.1091/mbc.e16-01-0069	2016	yes	whole_pop	natural_starvation;	laboratory;	auxotroph	4 days - 1 week (+96h, up to 7 days, 168h);	Growth phenotypes; Life span; Genome organization and integrity; Cell signalling; Cell’s morphology;
Q_114	Yeast quiescence exit swiftness is influenced by cell volume and chronological age	doi: 10.15698/mic2018.02.615	2018	yes	whole_pop	natural_starvation;	laboratory;	auxotroph	4 days - 1 week (+96h, up to 7 days, 168h);	Growth phenotypes; Life span; Cell cycle; Cell’s morphology; Metabolism - Carbon;
Q_115	The coordinated action of the MVB pathway and autophagy ensures cell survival during starvation	10.7554/eLife.07736	2015	yes	whole_pop	natural_starvation;	laboratory;	both	not specified / not applicable;	Growth phenotypes; Life span; Cell signalling; Gene expression; Cell’s morphology; Metabolism - Amino-acids and nutrients; Metabolism - Storage materials and other;
Q_116	pH neutralization protects against reduction in replicative lifespan following chronological aging in yeast	10.4161/cc.21465	2012	yes	subpop	natural_starvation;	laboratory;	auxotroph	1 - 2 days (24h - 48h);	Growth phenotypes; Life span; Cell cycle;
Q_117	Increased lignocellulosic inhibitor tolerance of Saccharomyces cerevisiae cell populations in early stationary phase	10.1186/s13068-017-0794-0	2017	yes	whole_pop	natural_starvation;	laboratory;non-laboratory;	both	1 - 2 days (24h - 48h);	Growth phenotypes; Metabolism - Carbon;
Q_118	Indole-3-acetic acid is a physiological inhibitor of TORC1 in yeast	10.1371/journal.pgen.1009414	2021	yes	whole_pop	natural_starvation;abrupt_starvation;	laboratory;	both	not specified / not applicable;	Growth phenotypes; Cell signalling; Metabolism - Storage materials and other;
Q_119	Comparative Analysis of Multiple Genome-Scale Data Sets	doi:10.1101/gr.225402	2002	yes	whole_pop	natural_starvation;	laboratory;	prototroph	4 days - 1 week (+96h, up to 7 days, 168h);	Cell cycle; Cell signalling; Gene expression;
Q_120	DNA replication stress-induced loss of reproductive capacity in S. cerevisiae and its inhibition by caloric restriction	https://doi.org/10.4161/cc.24232	2013	yes	whole_pop	natural_starvation;	laboratory;	auxotroph	not specified / not applicable;	Growth phenotypes; Life span; Cell cycle; Genome organization and integrity; Cell signalling; Gene expression; Metabolism - Carbon;
Q_121	DNA Replication Stress Is a Determinant of Chronological Lifespan in Budding Yeast	doi:10.1371/journal.pone.0000748	2007	yes	whole_pop	natural_starvation;abrupt_starvation;	laboratory;	auxotroph	not specified / not applicable;	Growth phenotypes; Life span; Cell cycle; Genome organization and integrity; Cell signalling; Cell’s morphology; Metabolism - Storage materials and other;
Q_122	Growth signaling promotes chronological aging in budding yeast by inducing superoxide anions that inhibit quiescence	DOI: 10.18632/aging.100215	2010	yes	whole_pop	natural_starvation;	laboratory;	auxotroph	not specified / not applicable;	Life span; Cell cycle; Cell signalling; Metabolism - Carbon; Metabolism - Storage materials and other;
Q_123	Modified MuDPIT Separation Identified 4488 Proteins in a Systemwide Analysis of Quiescence in Yeast	dx.doi.org/10.1021/pr400027m	2013	yes	subpop	natural_starvation;	laboratory;	prototroph	4 days - 1 week (+96h, up to 7 days, 168h);	Gene expression;
Q_124	Regulation of G0 entry by the Pho80–Pho85 cyclin–CDK complex	doi:10.1038/ sj.emboj.7600889	2005	yes	whole_pop	abrupt_starvation;natural_starvation;	laboratory;	auxotroph	4 days - 1 week (+96h, up to 7 days, 168h);	Life span; Cell cycle; Cell signalling; Cell’s morphology; Metabolism - Storage materials and other;
Q_125	Genome-wide expression analyses of the stationary phase model of ageing in yeast	http://dx.doi.org/10.1016/j.mad.2015.05.008	2015	yes	whole_pop	natural_starvation;	laboratory;	not specified	4 days - 1 week (+96h, up to 7 days, 168h);	Life span; Cell signalling; Gene expression;
Q_126	High-Resolution Microscopy to Learn the Nuclear Organization of the Living Yeast Cells	https://doi.org/10.1155/2021/9951114	2021	yes	whole_pop	natural_starvation;	laboratory;	auxotroph	not specified / not applicable;	Genome organization and integrity; Cell’s morphology; Metabolism - Carbon;
Q_127	A prolonged chronological lifespan is an unexpected benefit of the [PSI+] prion in yeast	https://doi.org/10.1371/journal. pone.0184905	2017	yes	whole_pop	natural_starvation;	laboratory;	auxotroph	not specified / not applicable;	Life span; Cell signalling;
Q_128	Telomere capping in non-dividing yeast cells requires Yku and Rap1	doi:10.1038/ emboj.2010.155	2010	yes	whole_pop	abrupt_starvation;natural_starvation;	laboratory;	auxotroph	2 - 4 days (49h - 96h);	Genome organization and integrity; Cell signalling; Gene expression;
Q_129	The Stationary-Phase Cells of Saccharomyces cerevisiae Display Dynamic Actin Filaments Required for Processes Extending Chronological Life Span	doi:10.1128/MCB.00811-15	2015	yes	whole_pop	natural_starvation;	laboratory;	auxotroph	1 - 2 days (24h - 48h);	Life span; Cell’s morphology; Metabolism - Storage materials and other;
Q_130	The Saccharomyces cerevisiae protein Stm1p facilitates ribosome preservation during quiescence	http://dx.doi.org/10.1016/j.bbrc.2012.11.078	2013	yes	whole_pop	natural_starvation;abrupt_starvation;	laboratory;	auxotroph	4 days - 1 week (+96h, up to 7 days, 168h);	Life span; Cell cycle; Cell signalling; Gene expression; Metabolism - Storage materials and other;
Q_131	Protein Synthesis During Transition and Stationary Phases Under Glucose Limitation in Saccharomyces cerevisiae	10.1128/jb.161.1.385-392.1985	1985	yes	whole_pop	natural_starvation;	laboratory;	prototroph	not specified / not applicable;	Life span; Cell cycle; Gene expression; Metabolism - Carbon;
Q_132	The Proteasome Lid Triggers COP9 Signalosome Activity during the Transition of Saccharomyces cerevisiae Cells into Quiescence	10.3390/biom9090449	2019	yes	whole_pop	natural_starvation;abrupt_starvation;	laboratory;	both	1 - 2 days (24h - 48h);	Growth phenotypes; Cell cycle; Cell signalling; Cell’s morphology; Metabolism - Storage materials and other;
Q_133	Bulk autophagy induction and life extension is achieved when iron is the only limited nutrient in Saccharomyces cerevisiae	10.1042/BCJ20200849	2021	yes	whole_pop	natural_starvation;	laboratory;	both	2 - 4 days (49h - 96h);	Growth phenotypes; Life span; Cell signalling; Cell’s morphology; Metabolism - Storage materials and other;
Q_134	The Catalytic Activity of the Ubp3 Deubiquitinating Protease Is Required for Efficient Stress Granule Assembly in Saccharomyces cerevisiae	10.1128/MCB.00609-15	2016	yes	whole_pop	natural_starvation;	laboratory;	auxotroph	4 days - 1 week (+96h, up to 7 days, 168h);	Growth phenotypes; Life span; Cell signalling; Gene expression; Cell’s morphology;
Q_135	Deteriorated Stress Response in Stationary-Phase Yeast: Sir2 and Yap1 Are Essential for Hsf1 Activation by Heat Shock and Oxidative Stress, Respectively	10.1371/journal.pone.0111505	2014	yes	whole_pop	natural_starvation;	laboratory;	auxotroph	2 - 4 days (49h - 96h);4 days - 1 week (+96h, up to 7 days, 168h);	Growth phenotypes; Cell signalling; Gene expression;
Q_136	Expression of the HsOrc1 gene, a human ORC1 homolog, is regulated by cell proliferation via the E2F transcription factor.	10.1128/mcb.16.12.6977	1996	yes	whole_pop	natural_starvation;	no-idea;	not specified	not specified / not applicable;	Cell signalling; Gene expression;
Q_137	Yeast Cells Can Enter a Quiescent State through d, S, G2, or M Phase of the Cell Cycle	none	1993	yes	whole_pop	abrupt_starvation;	laboratory;	auxotroph	not specified / not applicable;	Growth phenotypes; Life span; Cell cycle;
Q_138	High-resolution yeast quiescence profiling in human-like media reveals complex influences of auxotrophy and nutrient availability	10.1007/s11357-020-00265-2	2021	yes	whole_pop	natural_starvation;abrupt_starvation;	laboratory;	both	2 - 4 days (49h - 96h);	Growth phenotypes; Life span; Cell cycle; Cell signalling; Metabolism - Carbon; Metabolism - Amino-acids and nutrients;
Q_139	Effect of calorie restriction on the metabolic history of chronologically aging yeast	10.1016/j.exger.2009.06.001	2009	yes	whole_pop	natural_starvation;	laboratory;	auxotroph	1 - 2 weeks (+7days, up to 14 days);	Growth phenotypes; Life span; Gene expression; Cell’s morphology; Metabolism - Carbon; Metabolism - Storage materials and other;
Q_140	Integrity of the Saccharomyces cerevisiae Rpn11 Protein Is Critical for Formation of Proteasome Storage Granules (PSG) and Survival in Stationary Phase	10.1371/journal.pone.0070357	2013	yes	whole_pop	natural_starvation;	laboratory;	auxotroph	4 days - 1 week (+96h, up to 7 days, 168h);	Life span; Gene expression; Cell’s morphology; Metabolism - Storage materials and other;
Q_141	Low auxotrophy-complementing amino acid concentrations reduce yeast chronological life span	10.1016/j.mad.2007.04.003	2007	yes	whole_pop	natural_starvation;	laboratory;	both	not specified / not applicable;	Growth phenotypes; Life span; Cell signalling; Metabolism - Carbon; Metabolism - Amino-acids and nutrients;
Q_142	Processing Body and Stress Granule Assembly Occur by Independent and Differentially Regulated Pathways in Saccharomyces cerevisiae	10.1534/genetics.112.146993	2013	yes	whole_pop	natural_starvation;	laboratory;	both	4 days - 1 week (+96h, up to 7 days, 168h);	Growth phenotypes; Life span; Cell signalling; Gene expression; Cell’s morphology;
Q_143	Protein Kinases Are Associated with Multiple, Distinct Cytoplasmic Granules in Quiescent Yeast Cells	10.1534/genetics.114.172031	2014	yes	whole_pop	natural_starvation;	laboratory;	auxotroph	2 - 4 days (49h - 96h);	Cell signalling; Gene expression; Cell’s morphology;
Q_144	Controlling the Multifractal Generating Measures of Complex Networks	10.1038/s41598-020-62380-6	2020	yes	whole_pop	NA	no-idea;	not specified	not specified / not applicable;	Genome organization and integrity;
Q_145	Multiple Pathways Regulate Minisatellite Stability During Stationary Phase in Yeast	10.1534/g3.112.003673	2012	yes	whole_pop	natural_starvation;	laboratory;	both	4 days - 1 week (+96h, up to 7 days, 168h);	Genome organization and integrity; Cell signalling; Metabolism - Carbon;
Q_146	Acetyl-CoA induces transcription of the key G1 cyclin CLN3 to promote entry into the cell division cycle in Saccharomyces cerevisiae	10.1073/pnas.1302490110	2013	yes	whole_pop	natural_starvation;	laboratory;	prototroph	not specified / not applicable;	Growth phenotypes; Cell cycle; Genome organization and integrity; Cell signalling; Gene expression;
Q_147	Proliferation-dependent differential regulation of the dolichol pathway genes in Saccharomyces cerevisiae	10.1093/glycob/5.6.633	1995	yes	whole_pop	abrupt_starvation;	laboratory;	auxotroph	not specified / not applicable;	Cell cycle; Cell signalling;
Q_148	Metabolic switches from quiescence to growth in synchronized Saccharomyces cerevisiae	10.1007/s11306-019-1584-4	2019	yes	whole_pop	natural_starvation	laboratory;	not specified	not specified / not applicable;	Cell cycle; Cell signalling; Gene expression; Metabolism - Carbon; Metabolism - Amino-acids and nutrients; Metabolism - Storage materials and other;
Q_149	The Spt7 subunit of the SAGA complex is required for the regulation of lifespan in both dividing and nondividing yeast cells	10.1016/j.mad.2021.111480	2021	yes	whole_pop	natural_starvation;	laboratory;	auxotroph	not specified / not applicable;	Growth phenotypes; Life span; Genome organization and integrity; Cell signalling; Gene expression;
Q_150	High-Resolution Profiling of Stationary-Phase Survival Reveals Yeast Longevity Factors and Their Genetic Interactions	10.1371/journal.pgen.1004168	2014	yes	whole_pop	natural_starvation;	laboratory;	auxotroph	2 - 4 days (49h - 96h);4 days - 1 week (+96h, up to 7 days, 168h);	Life span; Cell signalling; Gene expression; Other;
Q_151	Metabolic cycling without cell division cycling in respiring yeast	10.1073/pnas.1116998108	2011	yes	whole_pop	natural_starvation;	laboratory;	prototroph	not specified / not applicable;	Life span; Cell cycle; Gene expression; Cell’s morphology; Metabolism - Carbon;
Q_152	Initiation of the yeast G0 program requires Igo1 and Igo2, which antagonize activation of decapping of specific nutrient-regulated mRNAs	10.4161/rna.8.1.13483	2011	yes	whole_pop	natural_starvation;	laboratory;	auxotroph	not specified / not applicable;	Cell cycle; Genome organization and integrity; Cell signalling;
Q_153	Lack of Sir2 increases acetate consumption and decreases extracellular pro-aging factors	https://doi.org/10.1016/j.bbamcr.2012.11.008	2013	yes	whole_pop	natural_starvation	laboratory;	both	2 - 4 days (49h - 96h);	Cell cycle; Cell signalling; Gene expression; Metabolism - Storage materials and other; Metabolism - Carbon;
Q_154	Spontaneous mutations in CYC8 and MIG1 suppress the short chronological lifespan of budding yeast lacking SNF1/AMPK	10.15698/mic2018.05.630	2018	yes	whole_pop	natural_starvation;	laboratory;	auxotroph	not specified / not applicable;	Life span; Genome organization and integrity; Cell signalling; Gene expression; Metabolism - Storage materials and other;
Q_155	The TOR and EGO Protein Complexes Orchestrate Microautophagy in Yeast: Molecular Cell	https://doi.org/10.1016/j.molcel.2005.05.020	2005	yes	whole_pop	abrupt_starvation;	laboratory;	auxotroph	not specified / not applicable;	Cell signalling; Gene expression; Cell’s morphology;
Q_156	A pH-driven transition of the cytoplasm from a fluid- to a solid-like state promotes entry into dormancy	10.7554/eLife.09347	2016	yes	whole_pop	natural_starvation;	laboratory;	auxotroph	not specified / not applicable;	Growth phenotypes; Cell signalling; Cell’s morphology;
Q_157	Rim15-dependent activation of Hsf1 and Msn2/4 transcription factors by direct phosphorylation in Saccharomyces cerevisiae	https://doi.org/10.1016/j.febslet.2013.10.004	2013	yes	whole_pop	abrupt_starvation;	laboratory;	auxotroph	not specified / not applicable;	Cell cycle; Cell signalling; Gene expression;
Q_158	Eukaryotic Translation Initiation Factor 4E-Dependent Translation Is Not Essential for Survival of Starved Yeast Cells	10.1128/JB.183.15.4477–4483.2001	2001	yes	whole_pop	natural_starvation;	laboratory;	auxotroph	1 - 2 days (24h - 48h);1 - 2 weeks (+7days, up to 14 days);	Life span; Gene expression; Growth phenotypes;
Q_159	Mtl1 O-mannosylation mediated by both Pmt1 and Pmt2 is important for cell survival under oxidative conditions and TOR blockade	10.1016/j.fgb.2012.08.005	2012	yes	whole_pop	natural_starvation;abrupt_starvation;	laboratory;	both	not specified / not applicable;2 - 4 days (49h - 96h);4 days - 1 week (+96h, up to 7 days, 168h);	Growth phenotypes; Gene expression; Cell’s morphology;
Q_160	A Method for High-Throughput Quantitative Analysis of Yeast Chronological Life Span	https://doi.org/10.1093/gerona/63.2.113	2008	yes	whole_pop	natural_starvation;	laboratory;	auxotroph	1 - 2 days (24h - 48h);	Growth phenotypes; Life span; Metabolism - Carbon; Metabolism - Amino-acids and nutrients;
Q_161	Loss of prohibitins, though it shortens the replicative life span of yeast cells undergoing division, does not shorten the chronological life span of G0-arrested cells	10.1016/s0047-6374(01)00326-8	2002	yes	whole_pop	natural_starvation;	laboratory;	auxotroph	2 - 4 days (49h - 96h);4 days - 1 week (+96h, up to 7 days, 168h);	Growth phenotypes; Life span; Metabolism - Carbon;
Q_162	Saccharomyces cerevisiae whi2 Mutants in Stationary Phase Retain the Properties of Exponentially Growing Cells	10.1099/00221287-131-9-2245	1985	yes	whole_pop	natural_starvation;	laboratory;	auxotroph	1 - 2 days (24h - 48h);	Growth phenotypes; Metabolism - Storage materials and other;
Q_163	Saccharomyces cerevisiae quiescent cells: cadmium resistance and adaptive response	10.1080/13102818.2021.1980106	2021	yes	subpop	natural_starvation;	laboratory;	both	4 days - 1 week (+96h, up to 7 days, 168h);	Growth phenotypes; Metabolism - Carbon;
Q_164	Effect of Cell Cycle Position on Thermotolerance in Saccharomyces cerevisiae	10.1128/jb.169.2.779-784.1987	1987	yes	whole_pop	abrupt_starvation;	laboratory;	auxotroph	not specified / not applicable;	Growth phenotypes; Life span; Cell cycle;
Q_165	The periodically expressed TMP1 gene of Saccharomyces cerevisiae is subject to START-dependent and START-independent regulation	10.1016/S0021-9258(18)55373-4	1991	yes	whole_pop	abrupt_starvation;	laboratory;	auxotroph	1 - 2 weeks (+7days, up to 14 days);	Growth phenotypes; Cell cycle; Gene expression;
Q_166	Tor1, Sch9 and PKA downregulation in quiescence rely on Mtl1 to preserve mitochondrial integrity and cell survival	10.1111/mmi.13013	2015	yes	whole_pop	natural_starvation;	laboratory;	auxotroph	2 - 4 days (49h - 96h);	Life span; Cell cycle; Cell signalling; Cell’s morphology; Metabolism - Carbon; Metabolism - Storage materials and other;
Q_167	Stratification of yeast cells during chronological aging by size points to the role of trehalose in cell vitality	10.1007/s10522-015-9625-5	2016	yes	subpop	natural_starvation;	laboratory;	auxotroph	less than 24h;1 - 2 days (24h - 48h);2 - 4 days (49h - 96h);4 days - 1 week (+96h, up to 7 days, 168h);1 - 2 weeks (+7days, up to 14 days);more than 14 days;	Growth phenotypes; Life span; Cell cycle; Cell’s morphology; Metabolism - Carbon; Metabolism - Storage materials and other;
Q_168	Initiation of the TORC1-Regulated G0 Program Requires Igo1/2, which License Specific mRNAs to Evade Degradation via the 50-30 mRNA Decay Pathway	10.1016/j.molcel.2010.02.039	2010	yes	whole_pop	abrupt_starvation;	laboratory;	auxotroph	2 - 4 days (49h - 96h);	Life span; Cell signalling; Gene expression; Cell’s morphology;
Q_169	UBC1 encodes a novel member of an essential subfamily of yeast ubiquitin-conjugating enzymes involved in protein degradation.	10.1002/j.1460-2075.1990.tb07905.x	1990	yes	whole_pop	natural_starvation;	laboratory;	auxotroph	not specified / not applicable;	Growth phenotypes; Cell signalling; Gene expression;
Q_170	Coordinated regulation of growth genes in Saccharomyces cerevisiae	10.4161/cc.6.10.4257.	2007	yes	whole_pop	abrupt_starvation;	laboratory;	auxotroph	1 - 2 days (24h - 48h);	Growth phenotypes; Genome organization and integrity; Cell signalling; Gene expression; Metabolism - Carbon;
Q_171	Carbon source influences Saccharomyces cerevisiae yeast cell survival strategies: quiescence or sporulation	10.1080/13102818.2019.1674188	2019	yes	subpop	natural_starvation;	non-laboratory;	not specified	4 days - 1 week (+96h, up to 7 days, 168h);	Life span; Metabolism - Carbon;
Q_172	The Rim15-endosulfine-PP2ACdc55 signalling module regulates entry into gametogenesis and quiescence via distinct mechanisms in budding yeast.	10.1371/journal.pgen.1004456	2014	yes	whole_pop	natural_starvation;abrupt_starvation;	laboratory;	both	not specified / not applicable;	Growth phenotypes; Cell signalling; Gene expression;
Q_173	A Single Site Phosphorylation on Hsp82 Ensures Cell Survival during Starvation in Saccharomyces cerevisiae	https://doi.org/10.1016/j.jmb.2020.09.003	2020	yes	whole_pop	natural_starvation;	laboratory;	auxotroph	2 - 4 days (49h - 96h);	Life span; Cell signalling; Gene expression; Cell’s morphology;
Q_174	Nutrient Signaling, Stress Response, and Inter-organelle Communication Are Non-canonical Determinants of Cell Fate	10.1016/j.celrep.2020.108446	2020	yes	whole_pop	abrupt_starvation;	laboratory;	auxotroph	not specified / not applicable;	Growth phenotypes; Cell cycle; Cell signalling; Cell’s morphology; Metabolism - Amino-acids and nutrients; Metabolism - Storage materials and other;
Q_175	Cell cycle–independent integration of stress signals by Xbp1 promotes Non-G1/G0 quiescence entry	https://doi.org/10.1083/jcb.202103171	2022	yes	whole_pop	abrupt_starvation;	laboratory;	auxotroph	not specified / not applicable;	Life span; Cell cycle; Cell signalling; Cell’s morphology; Metabolism - Storage materials and other;
Q_176	Monitoring dynamics of gene expression in yeast during stationary phase	10.1016/s0378-1119(99)00264-4	1999	yes	whole_pop	natural_starvation;	laboratory;	auxotroph	not specified / not applicable;	Growth phenotypes; Gene expression;
Q_177	Stb3 Plays a Role in the Glucose-Induced Transition from Quiescence to Growth in Saccharomyces cerevisiae	10.1534/genetics.110.116665	2010	yes	whole_pop	natural_starvation;abrupt_starvation;	laboratory;	both	2 - 4 days (49h - 96h);	Cell signalling; Cell’s morphology; Growth phenotypes; Metabolism - Carbon; Gene expression; Cell cycle; Life span;
Q_178	The histone deacetylase Hos2 forms an Hsp42-dependent cytoplasmic granule in quiescent yeast cells	10.1091/mbc.E11-09-0752	2012	yes	whole_pop	natural_starvation;	laboratory;	auxotroph	1 - 2 weeks (+7days, up to 14 days);more than 14 days;	Life span; Cell’s morphology; Growth phenotypes; Cell cycle; Gene expression; Cell signalling; Metabolism - Carbon;
Q_179	Regulation of UV damage repair in quiescent yeast cells	10.1016/j.dnarep.2020.102861	2020	yes	subpop	natural_starvation;abrupt_starvation;	laboratory;	auxotroph	4 days - 1 week (+96h, up to 7 days, 168h);	Genome organization and integrity; Growth phenotypes; Life span; Cell cycle;
Q_180	Preferential Ty1 retromobility in mother cells and nonquiescent stationary phase cells is associated with increased concentrations of total Gag or processed Gag and is inhibited by exposure to a high concentration of calcium	10.18632/aging.101402	2018	yes	subpop	natural_starvation;	laboratory;	auxotroph	1 - 2 weeks (+7days, up to 14 days);	Growth phenotypes; Cell cycle; Other; Gene expression; Life span; Genome organization and integrity;
Q_181	Mtl1 Is Required to Activate General Stress Response through Tor1 and Ras2 Inhibition under Conditions of Glucose Starvation and Oxidative Stress	10.1074/jbc.M109.085282	2010	yes	whole_pop	abrupt_starvation;	laboratory;	auxotroph	2 - 4 days (49h - 96h);	Growth phenotypes; Gene expression; Cell signalling; Metabolism - Storage materials and other; Metabolism - Carbon;
Q_182	Condensin-Dependent Chromatin Compaction Represses Transcription Globally during Quiescence	10.1016/j.molcel.2018.11.020	2019	yes	subpop	natural_starvation;	laboratory;	prototroph	4 days - 1 week (+96h, up to 7 days, 168h);	Gene expression; Cell’s morphology;
Q_183	Local chromatin fiber folding represses transcription and loop extrusion in quiescent cells	10.7554/eLife.72062	2021	yes	subpop	natural_starvation;	laboratory;	both	4 days - 1 week (+96h, up to 7 days, 168h);	Gene expression; Cell’s morphology; Life span;
Q_184	Cdc14 protein phosphatase and topoisomerase II mediate rDNA dynamics and nucleophagic degradation of nucleolar proteins after TORC1 inactivation	https://doi.org/10.1016/j.cellsig.2020.109884	2020	yes	whole_pop	abrupt_starvation;	laboratory;	auxotroph	4 days - 1 week (+96h, up to 7 days, 168h);	Cell cycle; Cell signalling; Genome organization and integrity;
Q_185	Tup1 is critical for transcriptional repression in Quiescence in S. cerevisiae	https:// doi.org/10.1371/journal.pgen.1010559	2022	yes	whole_pop;	natural_starvation;	laboratory;	auxotroph	2 - 4 days (49h - 96h);	Cell signaling;Gene expression ;Genome organization and integrity ;Cell’s morphology ;Cell cycle
Q_186	A common SSD1 truncation is toxic to cells entering quiescence and promotes sporulation	10.17912/micropub.biology.000671	2022	yes	subpop;	natural_starvation;	laboratory;	prototroph	4 days - 1 week (+96h, up to 7 days, 168h);1 - 2 weeks (+7days, up to 14 days);	Cell signaling ;Growth phenotypes
Q_187	Genome-Wide Analysis of Yeast Metabolic Cycle through Metabolic Network Models Reveals Superiority of Integrated ATAC-seq Data over RNA-seq Data	10.1128/msystems.01347-21	2022	yes	NA;	NA;	no-idea;	not specified	not specified / not applicable;	Gene expression ;Genome organization and integrity ;Metabolism - Storage materials and other ;
Q_188	Heterogeneity of Starved Yeast Cells in IF1 Levels Suggests the Role of This Protein in vivo	doi: 10.3389/fmicb.2022.816622	2022	yes	subpop;	natural_starvation;	laboratory;	auxotroph	4 days - 1 week (+96h, up to 7 days, 168h);	Cell cycle ;Cell signaling;Cell’s morphology ;Metabolism - Storage materials and other ;Metabolism - Carbon;
Q_189	When yeast cells change their mind: cell cycle “Start” is reversible under starvation	10.15252/embj.2021110321	2022	yes	whole_pop;	abrupt_starvation;	laboratory;	both	1 - 2 days (24h - 48h);	Cell cycle;Cell signaling ;Cell’s morphology;
Q_190	Diverse geroprotectors differently affect a mechanism linking cellular aging to cellular quiescence in budding yeast	DOI: 10.18632/oncotarget.28256	2022	yes	subpop;	natural_starvation;	laboratory;	auxotroph	4 days - 1 week (+96h, up to 7 days, 168h);1 - 2 weeks (+7days, up to 14 days);	Metabolism - Storage materials and other ;Growth phenotypes ;Life span;Cell cycle ;Cell signaling
Q_191	Cellular susceptibility and oxidative stress response to menadione of logarithmic, quiescent, and nonquiescent Saccharomyces cerevisiae cell populations	doi: 10.3897/biorisk.17.77320	2022	yes	subpop;	natural_starvation;	laboratory;	auxotroph	4 days - 1 week (+96h, up to 7 days, 168h);	Life span ;Growth phenotypes ;Metabolism - Carbon;Genome organization and integrity;Metabolism - Storage materials and other ;
Q_192	Saccharomyces cerevisiae yeast cells as a test system for assessing Zeocin toxicity	doi: 10.3897/biorisk.17.77227	2022	yes	subpop;	natural_starvation;	laboratory;	auxotroph	4 days - 1 week (+96h, up to 7 days, 168h);	Growth phenotypes ;Genome organization and integrity ;Metabolism - Storage materials and other ;Metabolism - Carbon;
Q_193	Whi7/Srl3 polymorphisms reveal its role in cell size and quiescence	DOI: 10.17912/micropub.biology.000661	2022	yes	subpop;	natural_starvation;	laboratory;	prototroph	4 days - 1 week (+96h, up to 7 days, 168h);	Cell cycle ;Cell’s morphology ;Life span ;Cell signaling
Q_194	Mitochondrial phosphatidylethanolamine synthesis affects mitochondrial energy metabolism and quiescence entry through attenuation of Snf1/AMPK signaling in yeast	DOI: 10.1096/fj.202101600RR	2022	yes	subpop;	natural_starvation;	laboratory;	auxotroph	1 - 2 days (24h - 48h);2 - 4 days (49h - 96h);	Metabolism - Storage materials and other ;Metabolism - Carbon;Cell cycle;Cell signaling;
Q_195	Sterol Metabolism Differentially Contributes to Maintenance and Exit of Quiescence	doi: 10.3389/fcell.2022.788472	2022	yes	whole_pop;	natural_starvation;	laboratory;	auxotroph	1 - 2 days (24h - 48h);2 - 4 days (49h - 96h);	Growth phenotypes ;Metabolism - Storage materials and other ;Metabolism - Carbon;Life span ;Cell cycle ;Cell’s morphology ;Cell signaling
Q_196	Cyclin C-Cdk8 Kinase Phosphorylation of Rim15 Prevents the Aberrant Activation of Stress Response Genes	doi: 10.3389/fcell.2022.867257	2022	yes	whole_pop;	abrupt_starvation;	laboratory;	auxotroph	1 - 2 days (24h - 48h);	Cell signaling ;Growth phenotypes ;Life span ;Cell’s morphology
Q_197	Chromosome condensed G1 phase yeast cells are tolerant to desiccation stress	doi: 10.15698/mic2022.02.770	2022	yes	whole_pop;	natural_starvation;	laboratory;	auxotroph	2 - 4 days (49h - 96h);	Cell cycle Budding, proliferation entry and exit, cell cycle phases, growth arrests at given cell cycle stage, spores,;Growth phenotypes Stress response - we apply stress (antifungals, drugs, heat shock), cell-cell and cell-environment interactions, growth kinetics, oxidative stress, growth curves, ;Cell’s morphology - Descriptive studies on cells’ morphology, spatial organization of organelles, …

## Sheet: year
ID	year
Q_001	2017
Q_002	2021
Q_003	2006
Q_004	2019
Q_005	2022
Q_006	2008
Q_007	2012
Q_008	2021
Q_009	2006
Q_010	2009
Q_011	2018
Q_012	2017
Q_013	2018
Q_014	2015
Q_015	2018
Q_016	2016
Q_017	2012
Q_018	2020
Q_019	2010
Q_020	1998
Q_021	2011
Q_022	2018
Q_023	2015
Q_024	2017
Q_025	2004
Q_026	2021
Q_027	2009
Q_028	2011
Q_029	2012
Q_030	2021
Q_031	2021
Q_032	2013
Q_033	2017
Q_034	2015
Q_035	2020
Q_036	2021
Q_037	2007
Q_038	2020
Q_039	2020
Q_040	2011
Q_041	2009
Q_042	2016
Q_043	2018
Q_044	2009
Q_045	2020
Q_046	2020
Q_047	2006
Q_048	2015
Q_049	2011
Q_050	2020
Q_051	2011
Q_052	2021
Q_053	2011
Q_054	2016
Q_055	2012
Q_056	2009
Q_057	2005
Q_058	2013
Q_059	2012
Q_060	2010
Q_061	2011
Q_062	2004
Q_063	2013
Q_064	2014
Q_065	2015
Q_066	2013
Q_067	2021
Q_068	2004
Q_069	2014
Q_070	2013
Q_071	2014
Q_072	2017
Q_073	2000
Q_074	2007
Q_075	2010
Q_076	2017
Q_077	2011
Q_078	2011
Q_079	2012
Q_080	2017
Q_081	2018
Q_082	2015
Q_083	2022
Q_084	2014
Q_085	2015
Q_086	2011
Q_087	2021
Q_088	2011
Q_089	2006
Q_090	2011
Q_091	2002
Q_092	2011
Q_093	2016
Q_094	2016
Q_095	2017
Q_096	2018
Q_097	2008
Q_098	2006
Q_099	2005
Q_100	2005
Q_101	2017
Q_102	2014
Q_103	2014
Q_104	2021
Q_105	2009
Q_106	2019
Q_107	2016
Q_108	2016
Q_109	2018
Q_110	2008
Q_111	2011
Q_112	2013
Q_113	2016
Q_114	2018
Q_115	2015
Q_116	2012
Q_117	2017
Q_118	2021
Q_119	2002
Q_120	2013
Q_121	2007
Q_122	2010
Q_123	2013
Q_124	2005
Q_125	2015
Q_126	2021
Q_127	2017
Q_128	2010
Q_129	2015
Q_130	2013
Q_131	1985
Q_132	2019
Q_133	2021
Q_134	2016
Q_135	2014
Q_136	1996
Q_137	1993
Q_138	2021
Q_139	2009
Q_140	2013
Q_141	2007
Q_142	2013
Q_143	2014
Q_144	2020
Q_145	2012
Q_146	2013
Q_147	1995
Q_148	2019
Q_149	2021
Q_150	2014
Q_151	2011
Q_152	2011
Q_153	2013
Q_154	2018
Q_155	2005
Q_156	2016
Q_157	2013
Q_158	2001
Q_159	2012
Q_160	2008
Q_161	2002
Q_162	1985
Q_163	2022
Q_164	1987
Q_165	1991
Q_166	2015
Q_167	2016
Q_168	2010
Q_169	1990
Q_170	2007
Q_171	2019
Q_172	2014
Q_173	2020
Q_174	2020
Q_175	2021
Q_176	1999
Q_177	2010
Q_178	2012
Q_179	2020
Q_180	2018
Q_181	2010
Q_182	2019
Q_183	2021
Q_184	2020
Q_185	2022
Q_186	2022
Q_187	2022
Q_188	2022
Q_189	2022
Q_190	2022
Q_191	2022
Q_192	2022
Q_193	2022
Q_194	2022
Q_195	2022
Q_196	2022
Q_197	2022

## Sheet: Q_meaning
ID	whole_pop	subpop
Q_001	0	1
Q_002	0	1
Q_003	1	0
Q_004	0	1
Q_005	0	1
Q_006	0	1
Q_007	1	0
Q_008	0	1
Q_009	0	1
Q_010	0	1
Q_011	0	1
Q_012	1	0
Q_013	0	1
Q_014	0	1
Q_015	1	0
Q_016	0	1
Q_017	1	0
Q_018	1	0
Q_019	0	1
Q_020	1	0
Q_021	1	0
Q_022	1	0
Q_023	0	1
Q_024	0	1
Q_025	1	0
Q_026	1	0
Q_027	0	1
Q_028	1	0
Q_029	1	0
Q_030	0	1
Q_031	0	1
Q_032	0	1
Q_033	0	1
Q_034	0	1
Q_035	1	0
Q_036	0	1
Q_037	1	0
Q_038	1	0
Q_039	0	1
Q_040	1	0
Q_041	1	0
Q_042	1	0
Q_043	1	0
Q_044	1	0
Q_045	0	1
Q_046	0	1
Q_047	0	1
Q_048	1	0
Q_049	1	0
Q_050	1	1
Q_051	1	0
Q_052	1	0
Q_053	0	1
Q_054	1	0
Q_055	1	0
Q_056	1	0
Q_057	1	0
Q_058	0	1
Q_059	0	1
Q_060	1	0
Q_061	1	0
Q_062	1	0
Q_063	1	0
Q_064	1	0
Q_065	1	0
Q_066	1	0
Q_067	1	0
Q_068	1	0
Q_069	1	0
Q_070	1	0
Q_071	1	0
Q_072	1	0
Q_073	1	0
Q_074	1	0
Q_075	1	0
Q_076	1	0
Q_077	0	1
Q_078	1	0
Q_079	1	0
Q_080	1	0
Q_081	0	1
Q_082	0	1
Q_083	1	0
Q_084	1	0
Q_085	1	0
Q_086	0	1
Q_087	1	0
Q_088	1	0
Q_089	1	0
Q_090	1	0
Q_091	1	0
Q_092	1	0
Q_093	1	0
Q_094	1	0
Q_095	1	0
Q_096	1	0
Q_097	1	0
Q_098	1	0
Q_099	1	0
Q_100	1	0
Q_101	0	1
Q_102	1	0
Q_103	0	1
Q_104	0	1
Q_105	0	1
Q_106	0	1
Q_107	0	1
Q_108	1	0
Q_109	1	0
Q_110	1	0
Q_111	1	0
Q_112	1	0
Q_113	1	0
Q_114	1	0
Q_115	1	0
Q_116	0	1
Q_117	1	0
Q_118	1	0
Q_119	1	0
Q_120	1	0
Q_121	1	0
Q_122	1	0
Q_123	0	1
Q_124	1	0
Q_125	1	0
Q_126	1	0
Q_127	1	0
Q_128	1	0
Q_129	1	0
Q_130	1	0
Q_131	1	0
Q_132	1	0
Q_133	1	0
Q_134	1	0
Q_135	1	0
Q_136	1	0
Q_137	1	0
Q_138	1	0
Q_139	1	0
Q_140	1	0
Q_141	1	0
Q_142	1	0
Q_143	1	0
Q_144	1	0
Q_145	1	0
Q_146	1	0
Q_147	1	0
Q_148	1	0
Q_149	1	0
Q_150	1	0
Q_151	1	0
Q_152	1	0
Q_153	1	0
Q_154	1	0
Q_155	1	0
Q_156	1	0
Q_157	1	0
Q_158	1	0
Q_159	1	0
Q_160	1	0
Q_161	1	0
Q_162	1	0
Q_163	0	1
Q_164	1	0
Q_165	1	0
Q_166	1	0
Q_167	0	1
Q_168	1	0
Q_169	1	0
Q_170	1	0
Q_171	0	1
Q_172	1	0
Q_173	1	0
Q_174	1	0
Q_175	1	0
Q_176	1	0
Q_177	1	0
Q_178	1	0
Q_179	0	1
Q_180	0	1
Q_181	1	0
Q_182	0	1
Q_183	0	1
Q_184	1	0
Q_185	1	0
Q_186	0	1
Q_187	1	0
Q_188	0	1
Q_189	1	0
Q_190	0	1
Q_191	0	1
Q_192	0	1
Q_193	0	1
Q_194	0	1
Q_195	1	0
Q_196	1	0
Q_197	1	0

## Sheet: subpop.identyf.
ID	how sub.pop were identified	fractionation	SP	other
Q_001	fractionation	1	0	0
Q_002	fractionation	1	0	0
Q_003	SP;	0	1	0
Q_004	fractionation	1	0	0
Q_005	fractionation	1	0	0
Q_006	fractionation	1	0	0
Q_007	SP;	0	1	0
Q_008	fractionation	1	0	0
Q_009	fractionation	1	0	0
Q_010	fractionation	1	0	0
Q_011	other;fractionation;	1	0	1
Q_012	SP;	0	1	0
Q_013	fractionation	1	0	0
Q_014	other;	0	0	1
Q_015	other;	0	0	1
Q_016	fractionation	1	0	0
Q_017	SP;	0	1	0
Q_018	other;	0	0	1
Q_019	fractionation	1	0	0
Q_020	SP;	0	1	0
Q_021	SP;	0	1	0
Q_022	SP;	0	1	0
Q_023	fractionation	1	0	0
Q_024	fractionation	1	0	0
Q_025	SP;	0	1	0
Q_026	SP;	0	1	0
Q_027	fractionation	1	0	0
Q_028	SP;	0	1	0
Q_029	SP;	0	1	0
Q_030	fractionation	1	0	0
Q_031	fractionation	1	0	0
Q_032	fractionation	1	0	0
Q_033	fractionation	1	0	0
Q_034	fractionation;	1	0	0
Q_035	SP;	0	1	0
Q_036	fractionation;	1	0	0
Q_037	SP;	0	1	0
Q_038	other;	0	0	1
Q_039	fractionation;	1	0	0
Q_040	fractionation;SP;	1	1	0
Q_041	SP;	0	1	0
Q_042	other;	0	0	1
Q_043	other;	0	0	1
Q_044	other;	0	0	1
Q_045	fractionation;	1	0	0
Q_046	fractionation;	1	0	0
Q_047	other;	0	0	1
Q_048	SP;	0	1	0
Q_049	other;	0	0	1
Q_050	fractionation;other;	1	0	1
Q_051	other;SP;	0	1	1
Q_052	SP;	0	1	0
Q_053	fractionation;	1	0	0
Q_054	SP;	0	1	0
Q_055	SP;	0	1	0
Q_056	SP;	0	1	0
Q_057	SP;	0	1	0
Q_058	fractionation;	1	0	0
Q_059	other;	0	0	1
Q_060	other;	0	0	1
Q_061	SP;	0	1	0
Q_062	other;	0	0	1
Q_063	SP;	0	1	0
Q_064	SP;	0	1	0
Q_065	SP;	0	1	0
Q_066	SP;	0	1	0
Q_067	other;	0	0	1
Q_068	SP;	0	1	0
Q_069	other;	0	0	1
Q_070	SP;	0	1	0
Q_071	SP;	0	1	0
Q_072	other;	0	0	1
Q_073	SP;	0	1	0
Q_074	SP;	0	1	0
Q_075	SP;	0	1	0
Q_076	other;SP;	0	1	1
Q_077	other;	0	0	1
Q_078	other;	0	0	1
Q_079	SP;	0	1	0
Q_080	other;	0	0	1
Q_081	fractionation;	1	0	0
Q_082	fractionation;	1	0	0
Q_083	SP;	0	1	0
Q_084	SP;	0	1	0
Q_085	SP;	0	1	0
Q_086	fractionation;	1	0	0
Q_087	SP;	0	1	0
Q_088	SP;	0	1	0
Q_089	SP;	0	1	0
Q_090	SP;	0	1	0
Q_091	SP;	0	1	0
Q_092	other;	0	0	1
Q_093	SP;	0	1	0
Q_094	SP;	0	1	0
Q_095	other;	0	0	1
Q_096	SP;	0	1	0
Q_097	SP;	0	1	0
Q_098	SP;	0	1	0
Q_099	SP;	0	1	0
Q_100	SP;	0	1	0
Q_101	other;	0	0	1
Q_102	SP;	0	1	0
Q_103	fractionation;	1	0	0
Q_104	fractionation;	1	0	0
Q_105	other;	0	0	1
Q_106	fractionation;	1	0	0
Q_107	fractionation;	1	0	0
Q_108	SP;other;	0	1	1
Q_109	SP;	0	1	0
Q_110	SP;	0	1	0
Q_111	SP;	0	1	0
Q_112	SP;	0	1	0
Q_113	SP;	0	1	0
Q_114	SP;	0	1	0
Q_115	SP;	0	1	0
Q_116	other;	0	0	1
Q_117	other;	0	0	1
Q_118	SP;	0	1	0
Q_119	SP;	0	1	0
Q_120	SP;	0	1	0
Q_121	SP;	0	1	0
Q_122	SP;	0	1	0
Q_123	fractionation;	1	0	0
Q_124	SP;	0	1	0
Q_125	SP;	0	1	0
Q_126	SP;	0	1	0
Q_127	SP;	0	1	0
Q_128	SP;	0	1	0
Q_129	SP;	0	1	0
Q_130	SP;	0	1	0
Q_131	SP;	0	1	0
Q_132	other;	0	0	1
Q_133	SP;	0	1	0
Q_134	SP;	0	1	0
Q_135	SP;	0	1	0
Q_136	SP;	0	1	0
Q_137	other;	0	0	1
Q_138	SP;	0	1	0
Q_139	SP;	0	1	0
Q_140	SP;	0	1	0
Q_141	other;	0	0	1
Q_142	SP;	0	1	0
Q_143	SP;	0	1	0
Q_144	SP;	0	1	0
Q_145	SP;	0	1	0
Q_146	SP;	0	1	0
Q_147	other;	0	0	1
Q_148	other;	0	0	1
Q_149	SP;	0	1	0
Q_150	SP;	0	1	0
Q_151	other;	0	0	1
Q_152	other;	0	0	1
Q_153	SP;	0	1	0
Q_154	SP;	0	1	0
Q_155	SP;	0	1	0
Q_156	SP;	0	1	0
Q_157	SP;	0	1	0
Q_158	SP;	0	1	0
Q_159	SP;other;	0	1	1
Q_160	SP;	0	1	0
Q_161	SP;	0	1	0
Q_162	SP;	0	1	0
Q_163	fractionation;	1	0	0
Q_164	other;	0	0	1
Q_165	SP;	0	1	0
Q_166	SP;	0	1	0
Q_167	other;	0	0	1
Q_168	SP;other;	0	1	1
Q_169	SP;	0	1	0
Q_170	SP;	0	1	0
Q_171	fractionation;	1	0	0
Q_172	SP;	0	1	0
Q_173	other;	0	0	1
Q_174	SP;	0	1	0
Q_175	SP;other;	0	1	1
Q_176	SP;	0	1	0
Q_177	SP;	0	1	0
Q_178	other;SP;	0	1	1
Q_179	fractionation;	1	0	0
Q_180	fractionation;	1	0	0
Q_181	SP;	0	1	0
Q_182	fractionation;	1	0	0
Q_183	fractionation;	1	0	0
Q_184	SP;	0	1	0
Q_185	SP	0	1	0
Q_186	fractionation	1	0	0
Q_187	other;	0	0	1
Q_188	other	0	0	1
Q_189	SP	0	1	0
Q_190	fractionation	1	0	0
Q_191	fractionation	1	0	0
Q_192	fractionation	1	0	0
Q_193	fractionation	1	0	0
Q_194	fractionation	1	0	0
Q_195	SP	0	1	0
Q_196	SP	0	1	0
Q_197	SP	0	1	0

## Sheet: starv_induction
ID	Starvation_type	natural_starvation	abrupt_starvation	NA
Q_001	natural_starvation;	1	0	0
Q_002	natural_starvation;	1	0	0
Q_003	natural_starvation;	1	0	0
Q_004	natural_starvation;	1	0	0
Q_005	natural_starvation;	1	0	0
Q_006	natural_starvation;	1	0	0
Q_007	natural_starvation;abrupt_starvation;	1	1	0
Q_008	natural_starvation;	1	0	0
Q_009	natural_starvation;	1	0	0
Q_010	natural_starvation;	1	0	0
Q_011	natural_starvation;	1	0	0
Q_012	natural_starvation;	1	0	0
Q_013	natural_starvation;	1	0	0
Q_014	natural_starvation;abrupt_starvation;	1	1	0
Q_015	natural_starvation;	1	0	0
Q_016	natural_starvation;	1	0	0
Q_017	natural_starvation;	1	0	0
Q_018	natural_starvation;	1	0	0
Q_019	natural_starvation;	1	0	0
Q_020	natural_starvation;	1	0	0
Q_021	abrupt_starvation;	0	1	0
Q_022	natural_starvation;	1	0	0
Q_023	natural_starvation;	1	0	0
Q_024	natural_starvation;	1	0	0
Q_025	natural_starvation;	1	0	0
Q_026	natural_starvation;	1	0	0
Q_027	natural_starvation;abrupt_starvation;	1	1	0
Q_028	natural_starvation;	1	0	0
Q_029	natural_starvation;	1	0	0
Q_030	natural_starvation;abrupt_starvation;	1	1	0
Q_031	natural_starvation;	1	0	0
Q_032	natural_starvation;	1	0	0
Q_033	natural_starvation;	1	0	0
Q_034	natural_starvation;	1	0	0
Q_035	abrupt_starvation;	0	1	0
Q_036	natural_starvation;	1	0	0
Q_037	natural_starvation;	1	0	0
Q_038	natural_starvation;	1	0	0
Q_039	natural_starvation;abrupt_starvation;	1	1	0
Q_040	natural_starvation;	1	0	0
Q_041	natural_starvation;	1	0	0
Q_042	natural_starvation	1	0	0
Q_043	abrupt_starvation;	0	1	0
Q_044	NA	0	0	1
Q_045	natural_starvation;	1	0	0
Q_046	natural_starvation;	1	0	0
Q_047	natural_starvation;	1	0	0
Q_048	natural_starvation;	1	0	0
Q_049	natural_starvation	1	0	0
Q_050	natural_starvation;abrupt_starvation;	1	1	0
Q_051	natural_starvation;	1	0	0
Q_052	abrupt_starvation;	0	1	0
Q_053	natural_starvation;	1	0	0
Q_054	natural_starvation;	1	0	0
Q_055	natural_starvation;	1	0	0
Q_056	natural_starvation;	1	0	0
Q_057	natural_starvation;	1	0	0
Q_058	natural_starvation;	1	0	0
Q_059	natural_starvation;	1	0	0
Q_060	natural_starvation;abrupt_starvation;	1	1	0
Q_061	abrupt_starvation;	0	1	0
Q_062	natural_starvation;abrupt_starvation;	1	1	0
Q_063	natural_starvation;	1	0	0
Q_064	natural_starvation;	1	0	0
Q_065	abrupt_starvation;	0	1	0
Q_066	natural_starvation;	1	0	0
Q_067	natural_starvation;	1	0	0
Q_068	natural_starvation;	1	0	0
Q_069	natural_starvation;	1	0	0
Q_070	abrupt_starvation;	0	1	0
Q_071	natural_starvation;abrupt_starvation;	1	1	0
Q_072	natural_starvation;	1	0	0
Q_073	natural_starvation;	1	0	0
Q_074	natural_starvation;	1	0	0
Q_075	natural_starvation;	1	0	0
Q_076	abrupt_starvation;	0	1	0
Q_077	natural_starvation;	1	0	0
Q_078	abrupt_starvation;natural_starvation;	1	1	0
Q_079	natural_starvation;	1	0	0
Q_080	natural_starvation;	1	0	0
Q_081	natural_starvation;	1	0	0
Q_082	natural_starvation;	1	0	0
Q_083	natural_starvation;abrupt_starvation;	1	1	0
Q_084	natural_starvation;	1	0	0
Q_085	abrupt_starvation;	0	1	0
Q_086	NA	0	0	1
Q_087	natural_starvation;	1	0	0
Q_088	natural_starvation;	1	0	0
Q_089	natural_starvation;	1	0	0
Q_090	natural_starvation;	1	0	0
Q_091	natural_starvation;abrupt_starvation;	1	1	0
Q_092	natural_starvation	1	0	0
Q_093	natural_starvation;	1	0	0
Q_094	natural_starvation;	1	0	0
Q_095	natural_starvation;	1	0	0
Q_096	natural_starvation	1	0	0
Q_097	natural_starvation;	1	0	0
Q_098	natural_starvation;	1	0	0
Q_099	abrupt_starvation;natural_starvation;	1	1	0
Q_100	natural_starvation;	1	0	0
Q_101	natural_starvation;	1	0	0
Q_102	natural_starvation;	1	0	0
Q_103	natural_starvation;	1	0	0
Q_104	natural_starvation;	1	0	0
Q_105	natural_starvation;	1	0	0
Q_106	natural_starvation;	1	0	0
Q_107	natural_starvation;	1	0	0
Q_108	natural_starvation;abrupt_starvation;	1	1	0
Q_109	natural_starvation;	1	0	0
Q_110	natural_starvation;	1	0	0
Q_111	natural_starvation;	1	0	0
Q_112	natural_starvation;	1	0	0
Q_113	natural_starvation;	1	0	0
Q_114	natural_starvation;	1	0	0
Q_115	natural_starvation;	1	0	0
Q_116	natural_starvation;	1	0	0
Q_117	natural_starvation;	1	0	0
Q_118	natural_starvation;abrupt_starvation;	1	1	0
Q_119	natural_starvation;	1	0	0
Q_120	natural_starvation;	1	0	0
Q_121	natural_starvation;abrupt_starvation;	1	1	0
Q_122	natural_starvation;	1	0	0
Q_123	natural_starvation;	1	0	0
Q_124	abrupt_starvation;natural_starvation;	1	1	0
Q_125	natural_starvation;	1	0	0
Q_126	natural_starvation;	1	0	0
Q_127	natural_starvation;	1	0	0
Q_128	abrupt_starvation;natural_starvation;	1	1	0
Q_129	natural_starvation;	1	0	0
Q_130	natural_starvation;abrupt_starvation;	1	1	0
Q_131	natural_starvation;	1	0	0
Q_132	natural_starvation;abrupt_starvation;	1	1	0
Q_133	natural_starvation;	1	0	0
Q_134	natural_starvation;	1	0	0
Q_135	natural_starvation;	1	0	0
Q_136	natural_starvation;	1	0	0
Q_137	abrupt_starvation;	0	1	0
Q_138	natural_starvation;abrupt_starvation;	1	1	0
Q_139	natural_starvation;	1	0	0
Q_140	natural_starvation;	1	0	0
Q_141	natural_starvation;	1	0	0
Q_142	natural_starvation;	1	0	0
Q_143	natural_starvation;	1	0	0
Q_144	NA	0	0	1
Q_145	natural_starvation;	1	0	0
Q_146	natural_starvation;	1	0	0
Q_147	abrupt_starvation;	0	1	0
Q_148	natural_starvation	1	0	0
Q_149	natural_starvation;	1	0	0
Q_150	natural_starvation;	1	0	0
Q_151	natural_starvation;	1	0	0
Q_152	natural_starvation;	1	0	0
Q_153	natural_starvation	1	0	0
Q_154	natural_starvation;	1	0	0
Q_155	abrupt_starvation;	0	1	0
Q_156	natural_starvation;	1	0	0
Q_157	abrupt_starvation;	0	1	0
Q_158	natural_starvation;	1	0	0
Q_159	natural_starvation;abrupt_starvation;	1	1	0
Q_160	natural_starvation;	1	0	0
Q_161	natural_starvation;	1	0	0
Q_162	natural_starvation;	1	0	0
Q_163	natural_starvation;	1	0	0
Q_164	abrupt_starvation;	0	1	0
Q_165	abrupt_starvation;	0	1	0
Q_166	natural_starvation;	1	0	0
Q_167	natural_starvation;	1	0	0
Q_168	abrupt_starvation;	0	1	0
Q_169	natural_starvation;	1	0	0
Q_170	abrupt_starvation;	0	1	0
Q_171	natural_starvation;	1	0	0
Q_172	natural_starvation;abrupt_starvation;	1	1	0
Q_173	natural_starvation;	1	0	0
Q_174	abrupt_starvation;	0	1	0
Q_175	abrupt_starvation;	0	1	0
Q_176	natural_starvation;	1	0	0
Q_177	natural_starvation;abrupt_starvation;	1	1	0
Q_178	natural_starvation;	1	0	0
Q_179	natural_starvation;abrupt_starvation;	1	1	0
Q_180	natural_starvation;	1	0	0
Q_181	abrupt_starvation;	0	1	0
Q_182	natural_starvation;	1	0	0
Q_183	natural_starvation;	1	0	0
Q_184	abrupt_starvation;	0	1	0
Q_185	natural_starvation;	1	0	0
Q_186	natural_starvation;	1	0	0
Q_187	NA;	0	0	1
Q_188	natural_starvation;	1	0	0
Q_189	abrupt_starvation;	0	1	0
Q_190	natural_starvation;	1	0	0
Q_191	natural_starvation;	1	0	0
Q_192	natural_starvation;	1	0	0
Q_193	natural_starvation;	1	0	0
Q_194	natural_starvation;	1	0	0
Q_195	natural_starvation;	1	0	0
Q_196	abrupt_starvation;	0	1	0
Q_197	natural_starvation;	1	0	0

## Sheet: strain
ID	Strain	laboratory	non-laboratory	NA
Q_001	laboratory	1	0	0
Q_002	laboratory	1	0	0
Q_003	laboratory	1	0	0
Q_004	laboratory	1	0	0
Q_005	laboratory	1	0	0
Q_006	laboratory	1	0	0
Q_007	laboratory	1	0	0
Q_008	laboratory	1	0	0
Q_009	laboratory	1	0	0
Q_010	laboratory	1	0	0
Q_011	laboratory	1	0	0
Q_012	laboratory	1	0	0
Q_013	laboratory	1	0	0
Q_014	laboratory	1	0	0
Q_015	laboratory	1	0	0
Q_016	laboratory	1	0	0
Q_017	laboratory	1	0	0
Q_018	laboratory	1	0	0
Q_019	laboratory	1	0	0
Q_020	laboratory	1	0	0
Q_021	laboratory	1	0	0
Q_022	laboratory	1	0	0
Q_023	non-laboratory	1	1	0
Q_024	laboratory	1	0	0
Q_025	laboratory	1	0	0
Q_026	laboratory	1	0	0
Q_027	laboratory	1	0	0
Q_028	laboratory	1	0	0
Q_029	laboratory	1	0	0
Q_030	laboratory	1	0	0
Q_031	laboratory	1	0	0
Q_032	laboratory	1	0	0
Q_033	laboratory	1	0	0
Q_034	laboratory	1	0	0
Q_035	laboratory	1	0	0
Q_036	laboratory	1	0	0
Q_037	laboratory	1	0	0
Q_038	laboratory	1	0	0
Q_039	laboratory	1	0	0
Q_040	non-laboratory;laboratory;	1	1	0
Q_041	laboratory;	1	0	0
Q_042	laboratory;	1	0	0
Q_043	laboratory;	1	0	0
Q_044	no-idea;	0	0	0
Q_045	laboratory;	1	0	0
Q_046	laboratory;	1	0	0
Q_047	laboratory;	1	0	0
Q_048	laboratory;	1	0	0
Q_049	laboratory;	1	0	0
Q_050	laboratory;	1	0	0
Q_051	laboratory;	1	0	0
Q_052	laboratory;	1	0	0
Q_053	laboratory;	1	0	0
Q_054	laboratory;	1	0	0
Q_055	laboratory;	1	0	0
Q_056	laboratory;	1	0	0
Q_057	laboratory;	1	0	0
Q_058	laboratory;	1	0	0
Q_059	laboratory;	1	0	0
Q_060	laboratory;	1	0	0
Q_061	no-idea;	0	0	0
Q_062	laboratory;	1	0	0
Q_063	laboratory;	1	0	0
Q_064	laboratory;	1	0	0
Q_065	laboratory;	1	0	0
Q_066	laboratory;	1	0	0
Q_067	laboratory;	1	0	0
Q_068	laboratory;	1	0	0
Q_069	laboratory;	1	0	0
Q_070	laboratory;	1	0	0
Q_071	laboratory;	1	0	0
Q_072	laboratory;	1	0	0
Q_073	laboratory;	1	0	0
Q_074	laboratory;	1	0	0
Q_075	laboratory;	1	0	0
Q_076	laboratory;	1	0	0
Q_077	laboratory;	1	0	0
Q_078	laboratory;	1	0	0
Q_079	laboratory;	1	0	0
Q_080	laboratory;	1	0	0
Q_081	laboratory;	1	0	0
Q_082	laboratory;	1	0	0
Q_083	laboratory;	1	0	0
Q_084	laboratory;	1	0	0
Q_085	laboratory;	1	0	0
Q_086	no-idea;	0	0	0
Q_087	laboratory;	1	0	0
Q_088	laboratory;	1	0	0
Q_089	laboratory;	1	0	0
Q_090	laboratory;	1	0	0
Q_091	laboratory;	1	0	0
Q_092	laboratory;	1	0	0
Q_093	laboratory;	1	0	0
Q_094	laboratory;non-laboratory;	1	1	0
Q_095	laboratory;	1	0	0
Q_096	laboratory;	1	0	0
Q_097	laboratory;	1	0	0
Q_098	laboratory;	1	0	0
Q_099	laboratory;	1	0	0
Q_100	laboratory;	1	0	0
Q_101	laboratory;	1	0	0
Q_102	laboratory;	1	0	0
Q_103	laboratory;	1	0	0
Q_104	laboratory;	1	0	0
Q_105	laboratory;	1	0	0
Q_106	laboratory;	1	0	0
Q_107	laboratory;	1	0	0
Q_108	laboratory;	1	0	0
Q_109	laboratory;	1	0	0
Q_110	laboratory;	1	0	0
Q_111	laboratory;	1	0	0
Q_112	laboratory;	1	0	0
Q_113	laboratory;	1	0	0
Q_114	laboratory;	1	0	0
Q_115	laboratory;	1	0	0
Q_116	laboratory;	1	0	0
Q_117	laboratory;non-laboratory;	1	1	0
Q_118	laboratory;	1	0	0
Q_119	laboratory;	1	0	0
Q_120	laboratory;	1	0	0
Q_121	laboratory;	1	0	0
Q_122	laboratory;	1	0	0
Q_123	laboratory;	1	0	0
Q_124	laboratory;	1	0	0
Q_125	laboratory;	1	0	0
Q_126	laboratory;	1	0	0
Q_127	laboratory;	1	0	0
Q_128	laboratory;	1	0	0
Q_129	laboratory;	1	0	0
Q_130	laboratory;	1	0	0
Q_131	laboratory;	1	0	0
Q_132	laboratory;	1	0	0
Q_133	laboratory;	1	0	0
Q_134	laboratory;	1	0	0
Q_135	laboratory;	1	0	0
Q_136	no-idea;	0	0	0
Q_137	laboratory;	1	0	0
Q_138	laboratory;	1	0	0
Q_139	laboratory;	1	0	0
Q_140	laboratory;	1	0	0
Q_141	laboratory;	1	0	0
Q_142	laboratory;	1	0	0
Q_143	laboratory;	1	0	0
Q_144	no-idea;	0	0	0
Q_145	laboratory;	1	0	0
Q_146	laboratory;	1	0	0
Q_147	laboratory;	1	0	0
Q_148	laboratory;	1	0	0
Q_149	laboratory;	1	0	0
Q_150	laboratory;	1	0	0
Q_151	laboratory;	1	0	0
Q_152	laboratory;	1	0	0
Q_153	laboratory;	1	0	0
Q_154	laboratory;	1	0	0
Q_155	laboratory;	1	0	0
Q_156	laboratory;	1	0	0
Q_157	laboratory;	1	0	0
Q_158	laboratory;	1	0	0
Q_159	laboratory;	1	0	0
Q_160	laboratory;	1	0	0
Q_161	laboratory;	1	0	0
Q_162	laboratory;	1	0	0
Q_163	laboratory;	1	0	0
Q_164	laboratory;	1	0	0
Q_165	laboratory;	1	0	0
Q_166	laboratory;	1	0	0
Q_167	laboratory;	1	0	0
Q_168	laboratory;	1	0	0
Q_169	laboratory;	1	0	0
Q_170	laboratory;	1	0	0
Q_171	non-laboratory;	1	1	0
Q_172	laboratory;	1	0	0
Q_173	laboratory;	1	0	0
Q_174	laboratory;	1	0	0
Q_175	laboratory;	1	0	0
Q_176	laboratory;	1	0	0
Q_177	laboratory;	1	0	0
Q_178	laboratory;	1	0	0
Q_179	laboratory;	1	0	0
Q_180	laboratory;	1	0	0
Q_181	laboratory;	1	0	0
Q_182	laboratory;	1	0	0
Q_183	laboratory;	1	0	0
Q_184	laboratory;	1	0	0
Q_185	laboratory;	1	0	0
Q_186	laboratory;	1	0	0
Q_187	no-idea;	0	0	1
Q_188	laboratory;	1	0	0
Q_189	laboratory;	1	0	0
Q_190	laboratory;	1	0	0
Q_191	laboratory;	1	0	0
Q_192	laboratory;	1	0	0
Q_193	laboratory;	1	0	0
Q_194	laboratory;	1	0	0
Q_195	laboratory;	1	0	0
Q_196	laboratory;	1	0	0
Q_197	laboratory;	1	0	0

## Sheet: metabolic
ID	prototrophs	both	auxotrophs	not specified
Q_001	0	0	1	0
Q_002	0	0	1	0
Q_003	0	0	1	0
Q_004	0	0	1	0
Q_005	1	0	0	0
Q_006	0	0	1	0
Q_007	0	0	0	1
Q_008	1	0	0	0
Q_009	0	1	0	0
Q_010	1	0	0	0
Q_011	0	0	1	0
Q_012	0	0	1	0
Q_013	0	0	1	0
Q_014	0	0	1	0
Q_015	0	0	1	0
Q_016	1	0	0	0
Q_017	0	0	1	0
Q_018	0	0	1	0
Q_019	1	0	0	0
Q_020	0	0	1	0
Q_021	0	0	1	0
Q_022	0	0	1	0
Q_023	0	0	0	1
Q_024	0	0	1	0
Q_025	0	0	1	0
Q_026	0	0	1	0
Q_027	1	0	0	0
Q_028	1	0	0	0
Q_029	0	0	1	0
Q_030	0	0	1	0
Q_031	0	0	1	0
Q_032	1	0	0	0
Q_033	0	0	1	0
Q_034	0	1	0	0
Q_035	0	1	0	0
Q_036	0	0	1	0
Q_037	0	0	1	0
Q_038	1	0	0	0
Q_039	0	0	1	0
Q_040	0	0	0	1
Q_041	0	0	1	0
Q_042	1	0	0	0
Q_043	0	0	1	0
Q_044	0	0	0	1
Q_045	0	1	0	0
Q_046	1	0	0	0
Q_047	0	0	1	0
Q_048	0	0	1	0
Q_049	1	0	0	0
Q_050	0	0	1	0
Q_051	0	0	1	0
Q_052	0	0	1	0
Q_053	0	0	1	0
Q_054	0	0	1	0
Q_055	0	1	0	0
Q_056	0	0	1	0
Q_057	0	0	0	1
Q_058	1	0	0	0
Q_059	0	0	1	0
Q_060	0	0	1	0
Q_061	0	0	0	1
Q_062	0	0	1	0
Q_063	0	0	1	0
Q_064	0	0	1	0
Q_065	0	0	1	0
Q_066	0	0	1	0
Q_067	0	0	1	0
Q_068	1	0	0	0
Q_069	0	0	1	0
Q_070	0	0	1	0
Q_071	0	0	1	0
Q_072	0	0	1	0
Q_073	0	0	1	0
Q_074	0	0	1	0
Q_075	0	0	1	0
Q_076	1	0	0	0
Q_077	0	0	1	0
Q_078	0	0	1	0
Q_079	0	0	1	0
Q_080	0	0	1	0
Q_081	0	0	1	0
Q_082	1	0	0	0
Q_083	0	0	0	1
Q_084	0	0	1	0
Q_085	0	1	0	0
Q_086	0	0	0	1
Q_087	0	0	1	0
Q_088	0	0	1	0
Q_089	0	1	0	0
Q_090	1	0	0	0
Q_091	0	0	1	0
Q_092	1	0	0	0
Q_093	0	0	1	0
Q_094	0	0	1	0
Q_095	0	0	0	1
Q_096	0	0	0	1
Q_097	0	0	1	0
Q_098	0	1	0	0
Q_099	0	0	1	0
Q_100	0	0	1	0
Q_101	1	0	0	0
Q_102	0	0	1	0
Q_103	0	0	1	0
Q_104	0	0	1	0
Q_105	0	1	0	0
Q_106	1	0	0	0
Q_107	1	0	0	0
Q_108	1	0	0	0
Q_109	1	0	0	0
Q_110	0	0	1	0
Q_111	0	0	1	0
Q_112	0	0	1	0
Q_113	0	0	1	0
Q_114	0	0	1	0
Q_115	0	1	0	0
Q_116	0	0	1	0
Q_117	0	1	0	0
Q_118	0	1	0	0
Q_119	1	0	0	0
Q_120	0	0	1	0
Q_121	0	0	1	0
Q_122	0	0	1	0
Q_123	1	0	0	0
Q_124	0	0	1	0
Q_125	0	0	0	1
Q_126	0	0	1	0
Q_127	0	0	1	0
Q_128	0	0	1	0
Q_129	0	0	1	0
Q_130	0	0	1	0
Q_131	1	0	0	0
Q_132	0	1	0	0
Q_133	0	1	0	0
Q_134	0	0	1	0
Q_135	0	0	1	0
Q_136	0	0	0	1
Q_137	0	0	1	0
Q_138	0	1	0	0
Q_139	0	0	1	0
Q_140	0	0	1	0
Q_141	0	1	0	0
Q_142	0	1	0	0
Q_143	0	0	1	0
Q_144	0	0	0	1
Q_145	0	1	0	0
Q_146	1	0	0	0
Q_147	0	0	1	0
Q_148	0	0	0	1
Q_149	0	0	1	0
Q_150	0	0	1	0
Q_151	1	0	0	0
Q_152	0	0	1	0
Q_153	0	1	0	0
Q_154	0	0	1	0
Q_155	0	0	1	0
Q_156	0	0	1	0
Q_157	0	0	1	0
Q_158	0	0	1	0
Q_159	0	1	0	0
Q_160	0	0	1	0
Q_161	0	0	1	0
Q_162	0	0	1	0
Q_163	0	1	0	0
Q_164	0	0	1	0
Q_165	0	0	1	0
Q_166	0	0	1	0
Q_167	0	0	1	0
Q_168	0	0	1	0
Q_169	0	0	1	0
Q_170	0	0	1	0
Q_171	0	0	0	1
Q_172	0	1	0	0
Q_173	0	0	1	0
Q_174	0	0	1	0
Q_175	0	0	1	0
Q_176	0	0	1	0
Q_177	0	1	0	0
Q_178	0	0	1	0
Q_179	0	0	1	0
Q_180	0	0	1	0
Q_181	0	0	1	0
Q_182	1	0	0	0
Q_183	0	1	0	0
Q_184	0	0	1	0
Q_185	0	0	1	0
Q_186	1	0	0	0
Q_187	0	0	0	1
Q_188	0	0	1	0
Q_189	0	1	0	0
Q_190	0	0	1	0
Q_191	0	0	1	0
Q_192	0	0	1	0
Q_193	1	0	0	0
Q_194	0	0	1	0
Q_195	0	0	1	0
Q_196	0	0	1	0
Q_197	0	0	1	0

## Sheet: age
ID	age	less than 24h	1 - 2 days (24h - 48h)	2 - 4 days (49h - 96h)	4 days - 1 week (+96h, up to 7 days, 168h)	1 - 2 weeks (+7days, up to 14 days)	more than 14 days	not specified / not applicable
Q_001	2 - 4 days (49h - 96h);	0	0	1	0	0	0	0
Q_002	4 days - 1 week (+96h, up to 7 days, 168h);	0	0	0	1	0	0	0
Q_003	4 days - 1 week (+96h, up to 7 days, 168h);	0	0	0	1	0	0	0
Q_004	1 - 2 weeks (+7days, up to 14 days);	0	0	0	0	1	0	0
Q_005	2 - 4 days (49h - 96h);	0	0	1	0	0	0	0
Q_006	4 days - 1 week (+96h, up to 7 days, 168h);	0	0	0	1	0	0	0
Q_007	4 days - 1 week (+96h, up to 7 days, 168h);	0	0	0	1	0	0	0
Q_008	4 days - 1 week (+96h, up to 7 days, 168h);	0	0	0	1	0	0	0
Q_009	1 - 2 days (24h - 48h);2 - 4 days (49h - 96h);4 days - 1 week (+96h, up to 7 days, 168h);1 - 2 weeks (+7days, up to 14 days);more than 14 days;less than 24h;	1	1	1	1	1	1	0
Q_010	1 - 2 days (24h - 48h);	0	1	0	0	0	0	0
Q_011	4 days - 1 week (+96h, up to 7 days, 168h);	0	0	0	1	0	0	0
Q_012	4 days - 1 week (+96h, up to 7 days, 168h);	0	0	0	1	0	0	0
Q_013	1 - 2 weeks (+7days, up to 14 days);	0	0	0	0	1	0	0
Q_014	1 - 2 weeks (+7days, up to 14 days);	0	0	0	0	1	0	0
Q_015	not specified / not applicable;	0	0	0	0	0	0	1
Q_016	2 - 4 days (49h - 96h);	0	0	1	0	0	0	0
Q_017	4 days - 1 week (+96h, up to 7 days, 168h);1 - 2 weeks (+7days, up to 14 days);1 - 2 days (24h - 48h);	0	1	0	1	1	0	0
Q_018	not specified / not applicable;	0	0	0	0	0	0	1
Q_019	1 - 2 days (24h - 48h);2 - 4 days (49h - 96h);4 days - 1 week (+96h, up to 7 days, 168h);	0	1	1	1	0	0	0
Q_020	2 - 4 days (49h - 96h);	0	0	1	0	0	0	0
Q_021	2 - 4 days (49h - 96h);	0	0	1	0	0	0	0
Q_022	1 - 2 days (24h - 48h);	0	1	0	0	0	0	0
Q_023	1 - 2 weeks (+7days, up to 14 days);4 days - 1 week (+96h, up to 7 days, 168h);	0	0	0	1	1	0	0
Q_024	4 days - 1 week (+96h, up to 7 days, 168h);1 - 2 weeks (+7days, up to 14 days);more than 14 days;	0	0	0	1	1	1	0
Q_025	4 days - 1 week (+96h, up to 7 days, 168h);	0	0	0	1	0	0	0
Q_026	1 - 2 weeks (+7days, up to 14 days);	0	0	0	0	1	0	0
Q_027	4 days - 1 week (+96h, up to 7 days, 168h);1 - 2 weeks (+7days, up to 14 days);more than 14 days;	0	0	0	1	1	1	0
Q_028	less than 24h;1 - 2 days (24h - 48h);2 - 4 days (49h - 96h);4 days - 1 week (+96h, up to 7 days, 168h);1 - 2 weeks (+7days, up to 14 days);more than 14 days;	1	1	1	1	1	1	0
Q_029	not specified / not applicable;	0	0	0	0	0	0	1
Q_030	4 days - 1 week (+96h, up to 7 days, 168h);	0	0	0	1	0	0	0
Q_031	2 - 4 days (49h - 96h);	0	0	1	0	0	0	0
Q_032	4 days - 1 week (+96h, up to 7 days, 168h);	0	0	0	1	0	0	0
Q_033	4 days - 1 week (+96h, up to 7 days, 168h);1 - 2 weeks (+7days, up to 14 days);2 - 4 days (49h - 96h);	0	0	1	1	1	0	0
Q_034	less than 24h;2 - 4 days (49h - 96h);1 - 2 days (24h - 48h);4 days - 1 week (+96h, up to 7 days, 168h);	1	1	1	1	0	0	0
Q_035	2 - 4 days (49h - 96h);4 days - 1 week (+96h, up to 7 days, 168h);1 - 2 weeks (+7days, up to 14 days);	0	0	1	1	1	0	0
Q_036	4 days - 1 week (+96h, up to 7 days, 168h);	0	0	0	1	0	0	0
Q_037	2 - 4 days (49h - 96h);	0	0	1	0	0	0	0
Q_038	less than 24h;1 - 2 days (24h - 48h);2 - 4 days (49h - 96h);4 days - 1 week (+96h, up to 7 days, 168h);1 - 2 weeks (+7days, up to 14 days);more than 14 days;	1	1	1	1	1	1	0
Q_039	2 - 4 days (49h - 96h);	0	0	1	0	0	0	0
Q_040	1 - 2 days (24h - 48h);4 days - 1 week (+96h, up to 7 days, 168h);more than 14 days;	0	1	0	1	0	1	0
Q_041	2 - 4 days (49h - 96h);	0	0	1	0	0	0	0
Q_042	more than 14 days;1 - 2 weeks (+7days, up to 14 days);4 days - 1 week (+96h, up to 7 days, 168h);2 - 4 days (49h - 96h);less than 24h;	1	0	1	1	1	1	0
Q_043	1 - 2 days (24h - 48h);2 - 4 days (49h - 96h);	0	1	1	0	0	0	0
Q_044	not specified / not applicable;	0	0	0	0	0	0	1
Q_045	4 days - 1 week (+96h, up to 7 days, 168h);more than 14 days;	0	0	0	1	0	1	0
Q_046	2 - 4 days (49h - 96h);	0	0	1	0	0	0	0
Q_047	1 - 2 days (24h - 48h);2 - 4 days (49h - 96h);4 days - 1 week (+96h, up to 7 days, 168h);	0	1	1	1	0	0	0
Q_048	2 - 4 days (49h - 96h);	0	0	1	0	0	0	0
Q_049	less than 24h;4 days - 1 week (+96h, up to 7 days, 168h);1 - 2 weeks (+7days, up to 14 days);more than 14 days;	1	0	0	1	1	1	0
Q_050	4 days - 1 week (+96h, up to 7 days, 168h);	0	0	0	1	0	0	0
Q_051	4 days - 1 week (+96h, up to 7 days, 168h);	0	0	0	1	0	0	0
Q_052	not specified / not applicable;	0	0	0	0	0	0	1
Q_053	4 days - 1 week (+96h, up to 7 days, 168h);	0	0	0	1	0	0	0
Q_054	2 - 4 days (49h - 96h);	0	0	1	0	0	0	0
Q_055	2 - 4 days (49h - 96h);	0	0	1	0	0	0	0
Q_056	1 - 2 weeks (+7days, up to 14 days);	0	0	0	0	1	0	0
Q_057	not specified / not applicable;	0	0	0	0	0	0	1
Q_058	4 days - 1 week (+96h, up to 7 days, 168h);	0	0	0	1	0	0	0
Q_059	1 - 2 weeks (+7days, up to 14 days);more than 14 days;	0	0	0	0	1	1	0
Q_060	less than 24h;1 - 2 days (24h - 48h);2 - 4 days (49h - 96h);4 days - 1 week (+96h, up to 7 days, 168h);1 - 2 weeks (+7days, up to 14 days);more than 14 days;	1	1	1	1	1	1	0
Q_061	1 - 2 weeks (+7days, up to 14 days);	0	0	0	0	1	0	0
Q_062	1 - 2 weeks (+7days, up to 14 days);	0	0	0	0	1	0	0
Q_063	1 - 2 weeks (+7days, up to 14 days);	0	0	0	0	1	0	0
Q_064	not specified / not applicable;	0	0	0	0	0	0	1
Q_065	not specified / not applicable;	0	0	0	0	0	0	1
Q_066	1 - 2 weeks (+7days, up to 14 days);	0	0	0	0	1	0	0
Q_067	2 - 4 days (49h - 96h);	0	0	1	0	0	0	0
Q_068	4 days - 1 week (+96h, up to 7 days, 168h);	0	0	0	1	0	0	0
Q_069	less than 24h;	1	0	0	0	0	0	0
Q_070	4 days - 1 week (+96h, up to 7 days, 168h);	0	0	0	1	0	0	0
Q_071	2 - 4 days (49h - 96h);	0	0	1	0	0	0	0
Q_072	not specified / not applicable;	0	0	0	0	0	0	1
Q_073	2 - 4 days (49h - 96h);	0	0	1	0	0	0	0
Q_074	2 - 4 days (49h - 96h);	0	0	1	0	0	0	0
Q_075	2 - 4 days (49h - 96h);	0	0	1	0	0	0	0
Q_076	4 days - 1 week (+96h, up to 7 days, 168h);	0	0	0	1	0	0	0
Q_077	4 days - 1 week (+96h, up to 7 days, 168h);	0	0	0	1	0	0	0
Q_078	not specified / not applicable;	0	0	0	0	0	0	1
Q_079	4 days - 1 week (+96h, up to 7 days, 168h);	0	0	0	1	0	0	0
Q_080	2 - 4 days (49h - 96h);	0	0	1	0	0	0	0
Q_081	2 - 4 days (49h - 96h);	0	0	1	0	0	0	0
Q_082	4 days - 1 week (+96h, up to 7 days, 168h);	0	0	0	1	0	0	0
Q_083	4 days - 1 week (+96h, up to 7 days, 168h);	0	0	0	1	0	0	0
Q_084	2 - 4 days (49h - 96h);	0	0	1	0	0	0	0
Q_085	1 - 2 days (24h - 48h);	0	1	0	0	0	0	0
Q_086	not specified / not applicable;	0	0	0	0	0	0	1
Q_087	less than 24h;	1	0	0	0	0	0	0
Q_088	2 - 4 days (49h - 96h);	0	0	1	0	0	0	0
Q_089	2 - 4 days (49h - 96h);	0	0	1	0	0	0	0
Q_090	2 - 4 days (49h - 96h);4 days - 1 week (+96h, up to 7 days, 168h);	0	0	1	1	0	0	0
Q_091	less than 24h;	1	0	0	0	0	0	0
Q_092	more than 14 days;	0	0	0	0	0	1	0
Q_093	1 - 2 days (24h - 48h);2 - 4 days (49h - 96h);4 days - 1 week (+96h, up to 7 days, 168h);	0	1	1	1	0	0	0
Q_094	4 days - 1 week (+96h, up to 7 days, 168h);	0	0	0	1	0	0	0
Q_095	not specified / not applicable;	0	0	0	0	0	0	1
Q_096	not specified / not applicable;	0	0	0	0	0	0	1
Q_097	4 days - 1 week (+96h, up to 7 days, 168h);	0	0	0	1	0	0	0
Q_098	4 days - 1 week (+96h, up to 7 days, 168h);	0	0	0	1	0	0	0
Q_099	not specified / not applicable;	0	0	0	0	0	0	1
Q_100	1 - 2 weeks (+7days, up to 14 days);	0	0	0	0	1	0	0
Q_101	4 days - 1 week (+96h, up to 7 days, 168h);	0	0	0	1	0	0	0
Q_102	1 - 2 days (24h - 48h);2 - 4 days (49h - 96h);	0	1	1	0	0	0	0
Q_103	4 days - 1 week (+96h, up to 7 days, 168h);	0	0	0	1	0	0	0
Q_104	1 - 2 days (24h - 48h);2 - 4 days (49h - 96h);4 days - 1 week (+96h, up to 7 days, 168h);1 - 2 weeks (+7days, up to 14 days);more than 14 days;	0	1	1	1	1	1	0
Q_105	not specified / not applicable;	0	0	0	0	0	0	1
Q_106	4 days - 1 week (+96h, up to 7 days, 168h);	0	0	0	1	0	0	0
Q_107	4 days - 1 week (+96h, up to 7 days, 168h);	0	0	0	1	0	0	0
Q_108	4 days - 1 week (+96h, up to 7 days, 168h);	0	0	0	1	0	0	0
Q_109	4 days - 1 week (+96h, up to 7 days, 168h);	0	0	0	1	0	0	0
Q_110	2 - 4 days (49h - 96h);	0	0	1	0	0	0	0
Q_111	4 days - 1 week (+96h, up to 7 days, 168h);	0	0	0	1	0	0	0
Q_112	2 - 4 days (49h - 96h);	0	0	1	0	0	0	0
Q_113	4 days - 1 week (+96h, up to 7 days, 168h);	0	0	0	1	0	0	0
Q_114	4 days - 1 week (+96h, up to 7 days, 168h);	0	0	0	1	0	0	0
Q_115	not specified / not applicable;	0	0	0	0	0	0	1
Q_116	1 - 2 days (24h - 48h);	0	1	0	0	0	0	0
Q_117	1 - 2 days (24h - 48h);	0	1	0	0	0	0	0
Q_118	not specified / not applicable;	0	0	0	0	0	0	1
Q_119	4 days - 1 week (+96h, up to 7 days, 168h);	0	0	0	1	0	0	0
Q_120	not specified / not applicable;	0	0	0	0	0	0	1
Q_121	not specified / not applicable;	0	0	0	0	0	0	1
Q_122	not specified / not applicable;	0	0	0	0	0	0	1
Q_123	4 days - 1 week (+96h, up to 7 days, 168h);	0	0	0	1	0	0	0
Q_124	4 days - 1 week (+96h, up to 7 days, 168h);	0	0	0	1	0	0	0
Q_125	4 days - 1 week (+96h, up to 7 days, 168h);	0	0	0	1	0	0	0
Q_126	not specified / not applicable;	0	0	0	0	0	0	1
Q_127	not specified / not applicable;	0	0	0	0	0	0	1
Q_128	2 - 4 days (49h - 96h);	0	0	1	0	0	0	0
Q_129	1 - 2 days (24h - 48h);	0	1	0	0	0	0	0
Q_130	4 days - 1 week (+96h, up to 7 days, 168h);	0	0	0	1	0	0	0
Q_131	not specified / not applicable;	0	0	0	0	0	0	1
Q_132	1 - 2 days (24h - 48h);	0	1	0	0	0	0	0
Q_133	2 - 4 days (49h - 96h);	0	0	1	0	0	0	0
Q_134	4 days - 1 week (+96h, up to 7 days, 168h);	0	0	0	1	0	0	0
Q_135	2 - 4 days (49h - 96h);4 days - 1 week (+96h, up to 7 days, 168h);	0	0	1	1	0	0	0
Q_136	not specified / not applicable;	0	0	0	0	0	0	1
Q_137	not specified / not applicable;	0	0	0	0	0	0	1
Q_138	2 - 4 days (49h - 96h);	0	0	1	0	0	0	0
Q_139	1 - 2 weeks (+7days, up to 14 days);	0	0	0	0	1	0	0
Q_140	4 days - 1 week (+96h, up to 7 days, 168h);	0	0	0	1	0	0	0
Q_141	not specified / not applicable;	0	0	0	0	0	0	1
Q_142	4 days - 1 week (+96h, up to 7 days, 168h);	0	0	0	1	0	0	0
Q_143	2 - 4 days (49h - 96h);	0	0	1	0	0	0	0
Q_144	not specified / not applicable;	0	0	0	0	0	0	1
Q_145	4 days - 1 week (+96h, up to 7 days, 168h);	0	0	0	1	0	0	0
Q_146	not specified / not applicable;	0	0	0	0	0	0	1
Q_147	not specified / not applicable;	0	0	0	0	0	0	1
Q_148	not specified / not applicable;	0	0	0	0	0	0	1
Q_149	not specified / not applicable;	0	0	0	0	0	0	1
Q_150	2 - 4 days (49h - 96h);4 days - 1 week (+96h, up to 7 days, 168h);	0	0	1	1	0	0	0
Q_151	not specified / not applicable;	0	0	0	0	0	0	1
Q_152	not specified / not applicable;	0	0	0	0	0	0	1
Q_153	2 - 4 days (49h - 96h);	0	0	1	0	0	0	0
Q_154	not specified / not applicable;	0	0	0	0	0	0	1
Q_155	not specified / not applicable;	0	0	0	0	0	0	1
Q_156	not specified / not applicable;	0	0	0	0	0	0	1
Q_157	not specified / not applicable;	0	0	0	0	0	0	1
Q_158	1 - 2 days (24h - 48h);1 - 2 weeks (+7days, up to 14 days);	0	1	0	0	1	0	0
Q_159	not specified / not applicable;2 - 4 days (49h - 96h);4 days - 1 week (+96h, up to 7 days, 168h);	0	0	1	1	0	0	1
Q_160	1 - 2 days (24h - 48h);	0	1	0	0	0	0	0
Q_161	2 - 4 days (49h - 96h);4 days - 1 week (+96h, up to 7 days, 168h);	0	0	1	1	0	0	0
Q_162	1 - 2 days (24h - 48h);	0	1	0	0	0	0	0
Q_163	4 days - 1 week (+96h, up to 7 days, 168h);	0	0	0	1	0	0	0
Q_164	not specified / not applicable;	0	0	0	0	0	0	1
Q_165	1 - 2 weeks (+7days, up to 14 days);	0	0	0	0	1	0	0
Q_166	2 - 4 days (49h - 96h);	0	0	1	0	0	0	0
Q_167	less than 24h;1 - 2 days (24h - 48h);2 - 4 days (49h - 96h);4 days - 1 week (+96h, up to 7 days, 168h);1 - 2 weeks (+7days, up to 14 days);more than 14 days;	1	1	1	1	1	1	0
Q_168	2 - 4 days (49h - 96h);	0	0	1	0	0	0	0
Q_169	not specified / not applicable;	0	0	0	0	0	0	1
Q_170	1 - 2 days (24h - 48h);	0	1	0	0	0	0	0
Q_171	4 days - 1 week (+96h, up to 7 days, 168h);	0	0	0	1	0	0	0
Q_172	not specified / not applicable;	0	0	0	0	0	0	1
Q_173	2 - 4 days (49h - 96h);	0	0	1	0	0	0	0
Q_174	not specified / not applicable;	0	0	0	0	0	0	1
Q_175	not specified / not applicable;	0	0	0	0	0	0	1
Q_176	not specified / not applicable;	0	0	0	0	0	0	1
Q_177	2 - 4 days (49h - 96h);	0	0	1	0	0	0	0
Q_178	1 - 2 weeks (+7days, up to 14 days);more than 14 days;	0	0	0	0	1	1	0
Q_179	4 days - 1 week (+96h, up to 7 days, 168h);	0	0	0	1	0	0	0
Q_180	1 - 2 weeks (+7days, up to 14 days);	0	0	0	0	1	0	0
Q_181	2 - 4 days (49h - 96h);	0	0	1	0	0	0	0
Q_182	4 days - 1 week (+96h, up to 7 days, 168h);	0	0	0	1	0	0	0
Q_183	4 days - 1 week (+96h, up to 7 days, 168h);	0	0	0	1	0	0	0
Q_184	4 days - 1 week (+96h, up to 7 days, 168h);	0	0	0	1	0	0	0
Q_185	2 - 4 days (49h - 96h);	0	0	1	0	0	0	0
Q_186	4 days - 1 week (+96h, up to 7 days, 168h);1 - 2 weeks (+7days, up to 14 days);	0	0	0	1	1	0	0
Q_187	not specified / not applicable;	0	0	0	0	0	0	1
Q_188	4 days - 1 week (+96h, up to 7 days, 168h);	0	0	0	1	0	0	0
Q_189	1 - 2 days (24h - 48h);	0	1	0	0	0	0	0
Q_190	4 days - 1 week (+96h, up to 7 days, 168h);1 - 2 weeks (+7days, up to 14 days);	0	0	0	1	1	0	0
Q_191	4 days - 1 week (+96h, up to 7 days, 168h);	0	0	0	1	0	0	0
Q_192	4 days - 1 week (+96h, up to 7 days, 168h);	0	0	0	1	0	0	0
Q_193	4 days - 1 week (+96h, up to 7 days, 168h);	0	0	0	1	0	0	0
Q_194	1 - 2 days (24h - 48h);2 - 4 days (49h - 96h);	0	1	1	0	0	0	0
Q_195	1 - 2 days (24h - 48h);2 - 4 days (49h - 96h);	0	1	1	0	0	0	0
Q_196	1 - 2 days (24h - 48h);	0	1	0	0	0	0	0
Q_197	2 - 4 days (49h - 96h);	0	0	1	0	0	0	0

## Sheet: biol_aspect
ID	what aspects are studied?	Growth phenotypes	Life span	Cell cycle	Genome organization and integrity	Cell signalling	Gene expression	Cell’s morphology	Metabolism - Carbon	Metabolism - Amino-acids and nutrients	Metabolism - Storage materials and other	Other
Q_001	Growth phenotypes; Life span; Cell signalling; Other;	1	1	0	0	1	0	0	0	0	0	1
Q_002	Growth phenotypes; Cell signalling ; Gene expression;	1	0	0	0	1	1	0	0	0	0	0
Q_003	Growth phenotypes; Cell signalling; Gene expression;	1	0	0	0	1	1	0	0	0	0	0
Q_004	Genome organization and integrity ;	0	0	0	1	0	0	0	0	0	0	0
Q_005	Life span; Growth phenotypes;	1	1	0	0	0	0	0	0	0	0	0
Q_006	Growth phenotypes; Life span; Cell signalling ; Gene expression;	1	1	0	0	1	1	0	0	0	0	0
Q_007	Growth phenotypes; Cell cycle; Gene expression; Metabolism; Metabolism - Carbon;	1	0	1	0	0	1	0	1	0	0	0
Q_008	Gene expression; Cell cycle;	0	0	1	0	0	1	0	0	0	0	0
Q_009	Cell’s morphology; Metabolism; Life span; Cell cycle; Gene expression; Growth phenotypes;	1	1	1	0	0	1	1	0	0	0	0
Q_010	Gene expression; Growth phenotypes; Life span; Cell’s morphology; Metabolism - Carbon; Metabolism - Storage materials and other;	1	1	0	0	0	1	1	1	0	1	0
Q_011	Cell’s morphology; Life span;	0	1	0	0	0	0	1	0	0	0	0
Q_012	Cell’s morphology; Gene expression;	0	0	0	0	0	1	1	0	0	0	0
Q_013	Gene expression;	0	0	0	0	0	1	0	0	0	0	0
Q_014	Cell’s morphology; Gene expression; Growth phenotypes; Genome organization and integrity;	1	0	0	1	0	1	1	0	0	0	0
Q_015	Cell cycle; Growth phenotypes;	1	0	1	0	0	0	0	0	0	0	0
Q_016	Cell’s morphology; Growth phenotypes; Cell cycle;	1	0	1	0	0	0	1	0	0	0	0
Q_017	Gene expression; Metabolism;	0	0	0	0	0	1	0	0	0	0	0
Q_018	Life span; Growth phenotypes; Cell signalling;	1	1	0	0	1	0	0	0	0	0	0
Q_019	Growth phenotypes; Metabolism - Storage materials and other;	1	0	0	0	0	0	0	0	0	1	0
Q_020	Cell signalling; Cell cycle;	0	0	1	0	1	0	0	0	0	0	0
Q_021	Cell signalling; Growth phenotypes; Gene expression; Cell cycle;	1	0	1	0	1	1	0	0	0	0	0
Q_022	Cell signalling; Gene expression; Metabolism - Amino-acids and nutrients;	0	0	0	0	1	1	0	0	1	0	0
Q_023	Growth phenotypes; Cell’s morphology; Metabolism - Carbon;	1	0	0	0	0	0	1	1	0	0	0
Q_024	Genome organization and integrity; Metabolism - Storage materials and other; Metabolism - Carbon; Cell’s morphology; Growth phenotypes; Life span; Cell cycle;	1	1	1	1	0	0	1	1	0	1	0
Q_025	Growth phenotypes;	1	0	0	0	0	0	0	0	0	0	0
Q_026	Gene expression;	0	0	0	0	0	1	0	0	0	0	0
Q_027	Life span; Gene expression; Cell cycle;	0	1	1	0	0	1	0	0	0	0	0
Q_028	Growth phenotypes; Metabolism - Storage materials and other; Gene expression; Metabolism - Carbon;	1	0	0	0	0	1	0	1	0	1	0
Q_029	Cell cycle; Life span; Growth phenotypes; Genome organization and integrity;	1	1	1	1	0	0	0	0	0	0	0
Q_030	Cell cycle; Genome organization and integrity; Gene expression;	0	0	1	1	0	1	0	0	0	0	0
Q_031	Genome organization and integrity;	0	0	0	1	0	0	0	0	0	0	0
Q_032	Growth phenotypes; Metabolism - Storage materials and other; Cell’s morphology; Life span; Cell cycle;	1	1	1	0	0	0	1	0	0	1	0
Q_033	Gene expression; Genome organization and integrity;	0	0	0	1	0	1	0	0	0	0	0
Q_034	Other; Life span; Cell cycle;	0	1	1	0	0	0	0	0	0	0	1
Q_035	Metabolism - Storage materials and other; Cell’s morphology; Gene expression; Cell signalling;	0	0	0	0	1	1	1	0	0	1	0
Q_036	Cell signalling; Gene expression;	0	0	0	0	1	1	0	0	0	0	0
Q_037	Cell cycle; Cell signalling; Gene expression; Metabolism - Carbon	0	0	1	0	1	1	0	1	0	0	0
Q_038	Growth phenotypes; Life span; Cell signalling;	1	1	0	0	1	0	0	0	0	0	0
Q_039	Growth phenotypes; Life span; Cell cycle; Cell signalling; Gene expression; Cell’s morphology; Metabolism - Carbon; Metabolism - Amino-acids and nutrients; Metabolism - Storage materials and other;	1	1	1	0	1	1	1	1	1	1	0
Q_040	Growth phenotypes; Life span; Metabolism - Carbon;	1	1	0	0	0	0	0	1	0	0	0
Q_041	Growth phenotypes; Cell’s morphology; Cell cycle; Gene expression;	1	0	1	0	0	1	1	0	0	0	0
Q_042	Metabolism - Storage materials and other; Metabolism - Carbon; Cell cycle; Growth phenotypes; Cell’s morphology; Gene expression; Life span;	1	1	1	0	0	1	1	1	0	1	0
Q_043	Cell cycle; Cell signalling; Cell’s morphology; Metabolism - Carbon; Metabolism - Amino-acids and nutrients; Metabolism - Storage materials and other;	0	0	1	0	1	0	1	1	1	1	0
Q_044	Cell signalling; Gene expression;	0	0	0	0	1	1	0	0	0	0	0
Q_045	Growth phenotypes; Life span; Gene expression; Other;	1	1	0	0	0	1	0	0	0	0	1
Q_046	Cell signalling; Metabolism - Amino-acids and nutrients; Cell cycle;	0	0	1	0	1	0	0	0	1	0	0
Q_047	Genome organization and integrity; Cell’s morphology;	0	0	0	1	0	0	1	0	0	0	0
Q_048	Life span; Growth phenotypes; Cell’s morphology; Metabolism - Storage materials and other; Metabolism - Carbon;	1	1	0	0	0	0	1	1	0	1	0
Q_049	Metabolism - Storage materials and other; Gene expression; Growth phenotypes; Cell signalling; Cell’s morphology; Life span; Cell cycle;	1	1	1	0	1	1	1	0	0	1	0
Q_050	Gene expression; Genome organization and integrity;	0	0	0	1	0	1	0	0	0	0	0
Q_051	Genome organization and integrity;	0	0	0	1	0	0	0	0	0	0	0
Q_052	Cell signalling; Gene expression;	0	0	0	0	1	1	0	0	0	0	0
Q_053	Gene expression; Metabolism - Carbon;	0	0	0	0	0	1	0	1	0	0	0
Q_054	Growth phenotypes; Life span; Cell cycle; Cell signalling; Gene expression; Metabolism - Storage materials and other;	1	1	1	0	1	1	0	0	0	1	0
Q_055	Cell signalling; Gene expression;	0	0	0	0	1	1	0	0	0	0	0
Q_056	Genome organization and integrity; Metabolism - Carbon;	0	0	0	1	0	0	0	1	0	0	0
Q_057	Genome organization and integrity;	0	0	0	1	0	0	0	0	0	0	0
Q_058	Life span; Cell cycle; Cell signalling; Gene expression;	0	1	1	0	1	1	0	0	0	0	0
Q_059	Metabolism - Storage materials and other; Life span; Metabolism - Carbon; Cell signalling; Growth phenotypes;	1	1	0	0	1	0	0	1	0	1	0
Q_060	Life span; Other; Cell’s morphology;	0	1	0	0	0	0	1	0	0	0	1
Q_061	Life span; Gene expression; Other;	0	1	0	0	0	1	0	0	0	0	1
Q_062	Growth phenotypes; Cell cycle;	1	0	1	0	0	0	0	0	0	0	0
Q_063	Genome organization and integrity; Other;	0	0	0	1	0	0	0	0	0	0	1
Q_064	Life span; Cell cycle; Gene expression; Cell signalling; Growth phenotypes;	1	1	1	0	1	1	0	0	0	0	0
Q_065	Cell signalling; Gene expression; Cell’s morphology;	0	0	0	0	1	1	1	0	0	0	0
Q_066	Genome organization and integrity; Cell signalling;	0	0	0	1	1	0	0	0	0	0	0
Q_067	Cell cycle; Cell’s morphology;	0	0	1	0	0	0	1	0	0	0	0
Q_068	Cell cycle; Cell signalling; Gene expression;	0	0	1	0	1	1	0	0	0	0	0
Q_069	Growth phenotypes; Metabolism - Storage materials and other; Cell cycle;	1	0	1	0	0	0	0	0	0	1	0
Q_070	Cell signalling; Life span; Gene expression;	0	1	0	0	1	1	0	0	0	0	0
Q_071	Gene expression;	0	0	0	0	0	1	0	0	0	0	0
Q_072	Life span; Cell signalling; Metabolism - Carbon;	0	1	0	0	1	0	0	1	0	0	0
Q_073	Growth phenotypes; Genome organization and integrity; Cell signalling;	1	0	0	1	1	0	0	0	0	0	0
Q_074	Gene expression; Metabolism - Storage materials and other;	0	0	0	0	0	1	0	0	0	1	0
Q_075	Growth phenotypes; Life span; Cell cycle; Other;	1	1	1	0	0	0	0	0	0	0	1
Q_076	Cell’s morphology; Gene expression;	0	0	0	0	0	1	1	0	0	0	0
Q_077	Genome organization and integrity;	0	0	0	1	0	0	0	0	0	0	0
Q_078	Life span; Cell signalling; Gene expression; Cell’s morphology;	0	1	0	0	1	1	1	0	0	0	0
Q_079	Life span; Cell signalling;	0	1	0	0	1	0	0	0	0	0	0
Q_080	Growth phenotypes;	1	0	0	0	0	0	0	0	0	0	0
Q_081	Growth phenotypes; Life span; Cell cycle; Genome organization and integrity; Gene expression;	1	1	1	1	0	1	0	0	0	0	0
Q_082	Life span; Cell cycle; Genome organization and integrity; Gene expression;	0	1	1	1	0	1	0	0	0	0	0
Q_083	Genome organization and integrity; Gene expression;	0	0	0	1	0	1	0	0	0	0	0
Q_084	Cell cycle; Genome organization and integrity; Gene expression;	0	0	1	1	0	1	0	0	0	0	0
Q_085	Genome organization and integrity; Cell’s morphology;	0	0	0	1	0	0	1	0	0	0	0
Q_086	Cell signalling;	0	0	0	0	1	0	0	0	0	0	0
Q_087	Life span; Cell signalling; Gene expression; Cell’s morphology; Metabolism - Amino-acids and nutrients; Metabolism - Storage materials and other;	0	1	0	0	1	1	1	0	1	1	0
Q_088	Growth phenotypes; Cell cycle; Cell signalling; Gene expression; Metabolism - Carbon;	1	0	1	0	1	1	0	1	0	0	0
Q_089	Growth phenotypes; Cell signalling; Gene expression; Metabolism - Carbon; Metabolism - Amino-acids and nutrients; Metabolism - Storage materials and other;	1	0	0	0	1	1	0	1	1	1	0
Q_090	Growth phenotypes; Life span; Cell signalling; Gene expression; Metabolism - Carbon; Metabolism - Amino-acids and nutrients; Metabolism - Storage materials and other;	1	1	0	0	1	1	0	1	1	1	0
Q_091	Growth phenotypes; Life span; Cell signalling; Gene expression; Metabolism - Carbon; Metabolism - Amino-acids and nutrients;	1	1	0	0	1	1	0	1	1	0	0
Q_092	Growth phenotypes; Life span; Gene expression; Cell’s morphology; Metabolism - Carbon; Metabolism - Storage materials and other;	1	1	0	0	0	1	1	1	0	1	0
Q_093	Life span; Cell cycle; Cell signalling; Metabolism - Storage materials and other; Metabolism - Amino-acids and nutrients; Metabolism - Carbon;	0	1	1	0	1	0	0	1	1	1	0
Q_094	Cell cycle; Metabolism - Carbon;	0	0	1	0	0	0	0	1	0	0	0
Q_095	Cell signalling; Gene expression; Metabolism - Carbon;	0	0	0	0	1	1	0	1	0	0	0
Q_096	Cell cycle; Cell signalling; Metabolism - Carbon;	0	0	1	0	1	0	0	1	0	0	0
Q_097	Growth phenotypes; Cell cycle; Cell signalling; Cell’s morphology;	1	0	1	0	1	0	1	0	0	0	0
Q_098	Cell cycle; Gene expression; Cell’s morphology;	0	0	1	0	0	1	1	0	0	0	0
Q_099	Growth phenotypes; Cell cycle; Cell signalling; Cell’s morphology; Metabolism - Amino-acids and nutrients;	1	0	1	0	1	0	1	0	1	0	0
Q_100	Cell cycle; Cell signalling; Gene expression;	0	0	1	0	1	1	0	0	0	0	0
Q_101	Growth phenotypes; Cell’s morphology;	1	0	0	0	0	0	1	0	0	0	0
Q_102	Growth phenotypes; Life span; Cell cycle; Cell signalling; Gene expression; Cell’s morphology; Metabolism - Storage materials and other;	1	1	1	0	1	1	1	0	0	1	0
Q_103	Growth phenotypes; Cell’s morphology;	1	0	0	0	0	0	1	0	0	0	0
Q_104	Life span; Cell signalling; Metabolism - Storage materials and other;	0	1	0	0	1	0	0	0	0	1	0
Q_105	Life span;	0	1	0	0	0	0	0	0	0	0	0
Q_106	Growth phenotypes; Life span; Cell cycle; Cell signalling; Metabolism - Storage materials and other;	1	1	1	0	1	0	0	0	0	1	0
Q_107	Cell cycle; Cell signalling; Gene expression; Cell’s morphology;	0	0	1	0	1	1	1	0	0	0	0
Q_108	Growth phenotypes; Life span; Cell cycle; Gene expression; Cell’s morphology;	1	1	1	0	0	1	1	0	0	0	0
Q_109	Growth phenotypes; Life span; Gene expression; Cell’s morphology;	1	1	0	0	0	1	1	0	0	0	0
Q_110	Growth phenotypes; Life span; Cell’s morphology; Metabolism - Carbon; Metabolism - Storage materials and other;	1	1	0	0	0	0	1	1	0	1	0
Q_111	Growth phenotypes; Cell cycle; Cell’s morphology; Metabolism - Carbon;	1	0	1	0	0	0	1	1	0	0	0
Q_112	Life span; Cell signalling; Cell’s morphology;	0	1	0	0	1	0	1	0	0	0	0
Q_113	Growth phenotypes; Life span; Genome organization and integrity; Cell signalling; Cell’s morphology;	1	1	0	1	1	0	1	0	0	0	0
Q_114	Growth phenotypes; Life span; Cell cycle; Cell’s morphology; Metabolism - Carbon;	1	1	1	0	0	0	1	1	0	0	0
Q_115	Growth phenotypes; Life span; Cell signalling; Gene expression; Cell’s morphology; Metabolism - Amino-acids and nutrients; Metabolism - Storage materials and other;	1	1	0	0	1	1	1	0	1	1	0
Q_116	Growth phenotypes; Life span; Cell cycle;	1	1	1	0	0	0	0	0	0	0	0
Q_117	Growth phenotypes; Metabolism - Carbon;	1	0	0	0	0	0	0	1	0	0	0
Q_118	Growth phenotypes; Cell signalling; Metabolism - Storage materials and other;	1	0	0	0	1	0	0	0	0	1	0
Q_119	Cell cycle; Cell signalling; Gene expression;	0	0	1	0	1	1	0	0	0	0	0
Q_120	Growth phenotypes; Life span; Cell cycle; Genome organization and integrity; Cell signalling; Gene expression; Metabolism - Carbon;	1	1	1	1	1	1	0	1	0	0	0
Q_121	Growth phenotypes; Life span; Cell cycle; Genome organization and integrity; Cell signalling; Cell’s morphology; Metabolism - Storage materials and other;	1	1	1	1	1	0	1	0	0	1	0
Q_122	Life span; Cell cycle; Cell signalling; Metabolism - Carbon; Metabolism - Storage materials and other;	0	1	1	0	1	0	0	1	0	1	0
Q_123	Gene expression;	0	0	0	0	0	1	0	0	0	0	0
Q_124	Life span; Cell cycle; Cell signalling; Cell’s morphology; Metabolism - Storage materials and other;	0	1	1	0	1	0	1	0	0	1	0
Q_125	Life span; Cell signalling; Gene expression;	0	1	0	0	1	1	0	0	0	0	0
Q_126	Genome organization and integrity; Cell’s morphology; Metabolism - Carbon;	0	0	0	1	0	0	1	1	0	0	0
Q_127	Life span; Cell signalling;	0	1	0	0	1	0	0	0	0	0	0
Q_128	Genome organization and integrity; Cell signalling; Gene expression;	0	0	0	1	1	1	0	0	0	0	0
Q_129	Life span; Cell’s morphology; Metabolism - Storage materials and other;	0	1	0	0	0	0	1	0	0	1	0
Q_130	Life span; Cell cycle; Cell signalling; Gene expression; Metabolism - Storage materials and other;	0	1	1	0	1	1	0	0	0	1	0
Q_131	Life span; Cell cycle; Gene expression; Metabolism - Carbon;	0	1	1	0	0	1	0	1	0	0	0
Q_132	Growth phenotypes; Cell cycle; Cell signalling; Cell’s morphology; Metabolism - Storage materials and other;	1	0	1	0	1	0	1	0	0	1	0
Q_133	Growth phenotypes; Life span; Cell signalling; Cell’s morphology; Metabolism - Storage materials and other;	1	1	0	0	1	0	1	0	0	1	0
Q_134	Growth phenotypes; Life span; Cell signalling; Gene expression; Cell’s morphology;	1	1	0	0	1	1	1	0	0	0	0
Q_135	Growth phenotypes; Cell signalling; Gene expression;	1	0	0	0	1	1	0	0	0	0	0
Q_136	Cell signalling; Gene expression;	0	0	0	0	1	1	0	0	0	0	0
Q_137	Growth phenotypes; Life span; Cell cycle;	1	1	1	0	0	0	0	0	0	0	0
Q_138	Growth phenotypes; Life span; Cell cycle; Cell signalling; Metabolism - Carbon; Metabolism - Amino-acids and nutrients;	1	1	1	0	1	0	0	1	1	0	0
Q_139	Growth phenotypes; Life span; Gene expression; Cell’s morphology; Metabolism - Carbon; Metabolism - Storage materials and other;	1	1	0	0	0	1	1	1	0	1	0
Q_140	Life span; Gene expression; Cell’s morphology; Metabolism - Storage materials and other;	0	1	0	0	0	1	1	0	0	1	0
Q_141	Growth phenotypes; Life span; Cell signalling; Metabolism - Carbon; Metabolism - Amino-acids and nutrients;	1	1	0	0	1	0	0	1	1	0	0
Q_142	Growth phenotypes; Life span; Cell signalling; Gene expression; Cell’s morphology;	1	1	0	0	1	1	1	0	0	0	0
Q_143	Cell signalling; Gene expression; Cell’s morphology;	0	0	0	0	1	1	1	0	0	0	0
Q_144	Genome organization and integrity;	0	0	0	1	0	0	0	0	0	0	0
Q_145	Genome organization and integrity; Cell signalling; Metabolism - Carbon;	0	0	0	1	1	0	0	1	0	0	0
Q_146	Growth phenotypes; Cell cycle; Genome organization and integrity; Cell signalling; Gene expression;	1	0	1	1	1	1	0	0	0	0	0
Q_147	Cell cycle; Cell signalling;	0	0	1	0	1	0	0	0	0	0	0
Q_148	Cell cycle; Cell signalling; Gene expression; Metabolism - Carbon; Metabolism - Amino-acids and nutrients; Metabolism - Storage materials and other;	0	0	1	0	1	1	0	1	1	1	0
Q_149	Growth phenotypes; Life span; Genome organization and integrity; Cell signalling; Gene expression;	1	1	0	1	1	1	0	0	0	0	0
Q_150	Life span; Cell signalling; Gene expression; Other;	0	1	0	0	1	1	0	0	0	0	1
Q_151	Life span; Cell cycle; Gene expression; Cell’s morphology; Metabolism - Carbon;	0	1	1	0	0	1	1	1	0	0	0
Q_152	Cell cycle; Genome organization and integrity; Cell signalling;	0	0	1	1	1	0	0	0	0	0	0
Q_153	Cell cycle; Cell signalling; Gene expression; Metabolism - Storage materials and other; Metabolism - Carbon;	0	0	1	0	1	1	0	1	0	1	0
Q_154	Life span; Genome organization and integrity; Cell signalling; Gene expression; Metabolism - Storage materials and other;	0	1	0	1	1	1	0	0	0	1	0
Q_155	Cell signalling; Gene expression; Cell’s morphology;	0	0	0	0	1	1	1	0	0	0	0
Q_156	Growth phenotypes; Cell signalling; Cell’s morphology;	1	0	0	0	1	0	1	0	0	0	0
Q_157	Cell cycle; Cell signalling; Gene expression;	0	0	1	0	1	1	0	0	0	0	0
Q_158	Life span; Gene expression; Growth phenotypes;	1	1	0	0	0	1	0	0	0	0	0
Q_159	Growth phenotypes; Gene expression; Cell’s morphology;	1	0	0	0	0	1	1	0	0	0	0
Q_160	Growth phenotypes; Life span; Metabolism - Carbon; Metabolism - Amino-acids and nutrients;	1	1	0	0	0	0	0	1	1	0	0
Q_161	Growth phenotypes; Life span; Metabolism - Carbon;	1	1	0	0	0	0	0	1	0	0	0
Q_162	Growth phenotypes; Metabolism - Storage materials and other;	1	0	0	0	0	0	0	0	0	1	0
Q_163	Growth phenotypes; Metabolism - Carbon;	1	0	0	0	0	0	0	1	0	0	0
Q_164	Growth phenotypes; Life span; Cell cycle;	1	1	1	0	0	0	0	0	0	0	0
Q_165	Growth phenotypes; Cell cycle; Gene expression;	1	0	1	0	0	1	0	0	0	0	0
Q_166	Life span; Cell cycle; Cell signalling; Cell’s morphology; Metabolism - Carbon; Metabolism - Storage materials and other;	0	1	1	0	1	0	1	1	0	1	0
Q_167	Growth phenotypes; Life span; Cell cycle; Cell’s morphology; Metabolism - Carbon; Metabolism - Storage materials and other;	1	1	1	0	0	0	1	1	0	1	0
Q_168	Life span; Cell signalling; Gene expression; Cell’s morphology;	0	1	0	0	1	1	1	0	0	0	0
Q_169	Growth phenotypes; Cell signalling; Gene expression;	1	0	0	0	1	1	0	0	0	0	0
Q_170	Growth phenotypes; Genome organization and integrity; Cell signalling; Gene expression; Metabolism - Carbon;	1	0	0	1	1	1	0	1	0	0	0
Q_171	Life span; Metabolism - Carbon;	0	1	0	0	0	0	0	1	0	0	0
Q_172	Growth phenotypes; Cell signalling; Gene expression;	1	0	0	0	1	1	0	0	0	0	0
Q_173	Life span; Cell signalling; Gene expression; Cell’s morphology;	0	1	0	0	1	1	1	0	0	0	0
Q_174	Growth phenotypes; Cell cycle; Cell signalling; Cell’s morphology; Metabolism - Amino-acids and nutrients; Metabolism - Storage materials and other;	1	0	1	0	1	0	1	0	1	1	0
Q_175	Life span; Cell cycle; Cell signalling; Cell’s morphology; Metabolism - Storage materials and other;	0	1	1	0	1	0	1	0	0	1	0
Q_176	Growth phenotypes; Gene expression;	1	0	0	0	0	1	0	0	0	0	0
Q_177	Cell signalling; Cell’s morphology; Growth phenotypes; Metabolism - Carbon; Gene expression; Cell cycle; Life span;	1	1	1	0	1	1	1	1	0	0	0
Q_178	Life span; Cell’s morphology; Growth phenotypes; Cell cycle; Gene expression; Cell signalling; Metabolism - Carbon;	1	1	1	0	1	1	1	1	0	0	0
Q_179	Genome organization and integrity; Growth phenotypes; Life span; Cell cycle;	1	1	1	1	0	0	0	0	0	0	0
Q_180	Growth phenotypes; Cell cycle; Other; Gene expression; Life span; Genome organization and integrity;	1	1	1	1	0	1	0	0	0	0	1
Q_181	Growth phenotypes; Gene expression; Cell signalling; Metabolism - Storage materials and other; Metabolism - Carbon;	1	0	0	0	1	1	0	1	0	1	0
Q_182	Gene expression; Cell’s morphology;	0	0	0	0	0	1	1	0	0	0	0
Q_183	Gene expression; Cell’s morphology; Life span;	0	1	0	0	0	1	1	0	0	0	0
Q_184	Cell cycle; Cell signalling; Genome organization and integrity;	0	0	1	1	1	0	0	0	0	0	0
Q_185	Cell signaling;Gene expression ;Genome organization and integrity ;Cell’s morphology ;Cell cycle	0	0	1	1	0	1	1	0	0	0	0
Q_186	Cell signaling ;Growth phenotypes	1	0	0	0	0	0	0	0	0	0	0
Q_187	Gene expression ;Genome organization and integrity ;Metabolism - Storage materials and other ;	0	0	0	1	0	1	0	0	0	1	0
Q_188	Cell cycle ;Cell signaling;Cell’s morphology ;Metabolism - Storage materials and other ;Metabolism - Carbon;	0	0	1	0	0	0	1	1	0	1	0
Q_189	Cell cycle;Cell signaling ;Cell’s morphology;	0	0	1	0	0	0	1	0	0	0	0
Q_190	Metabolism - Storage materials and other ;Growth phenotypes ;Life span;Cell cycle ;Cell signaling	1	1	1	0	0	0	0	0	0	1	0
Q_191	Life span ;Growth phenotypes ;Metabolism - Carbon;Genome organization and integrity;Metabolism - Storage materials and other ;	1	1	0	1	0	0	0	1	0	1	0
Q_192	Growth phenotypes ;Genome organization and integrity ;Metabolism - Storage materials and other ;Metabolism - Carbon;	1	0	0	1	0	0	0	1	0	1	0
Q_193	Cell cycle ;Cell’s morphology ;Life span ;Cell signaling	0	1	1	0	0	0	1	0	0	0	0
Q_194	Metabolism - Storage materials and other ;Metabolism - Carbon;Cell cycle;Cell signaling;	0	0	1	0	0	0	0	1	0	1	0
Q_195	Growth phenotypes ;Metabolism - Storage materials and other ;Metabolism - Carbon;Life span ;Cell cycle ;Cell’s morphology ;Cell signaling	1	1	1	0	0	0	1	1	0	1	0
Q_196	Cell signaling ;Growth phenotypes ;Life span ;Cell’s morphology	1	1	0	0	0	0	1	0	0	0	0
Q_197	Cell cycle Budding, proliferation entry and exit, cell cycle phases, growth arrests at given cell cycle stage, spores,;Growth phenotypes Stress response - we apply stress (antifungals, drugs, heat shock), cell-cell and cell-environment interactions, growth kinetics, oxidative stress, growth curves, ;Cell’s morphology - Descriptive studies on cells’ morphology, spatial organization of organelles, …	1	1	1	1	0	0	1	0	0	0	0
